# Optimality of Maximal-Effort Vaccination

Matthew J. Penn<sup>1\*</sup> and Christl A. Donnelly<sup>1,2,3</sup>

<sup>1</sup>Department of Statistics, University of Oxford, St Giles',  
Oxford, OX1 3LB, United Kingdom.

<sup>2</sup>Department of Infectious Disease Epidemiology, Imperial  
College London, South Kensington Campus, London, SW7 2AZ,  
United Kingdom.

<sup>3</sup>Pandemic Sciences Institute, University of Oxford, Roosevelt  
Drive, Oxford, OX3 7DQ, United Kingdom.

\*Corresponding author(s). E-mail(s):

[matthew.penn@st-annes.ox.ac.uk](mailto:matthew.penn@st-annes.ox.ac.uk);

Contributing authors: [christl.donnelly@stats.ox.ac.uk](mailto:christl.donnelly@stats.ox.ac.uk);

## Abstract

It is widely acknowledged that vaccinating at maximal effort in the face of an ongoing epidemic is the best strategy to minimise infections and deaths from the disease. Despite this, no one has proved that this is guaranteed to be true if the disease follows multi-group SIR (Susceptible-Infected-Recovered) dynamics. This paper provides a novel proof of this principle for the existing SIR framework, showing that the total number of deaths or infections from an epidemic is decreasing in vaccination effort. Furthermore, it presents a novel model for vaccination which assumes that vaccines assigned to a subgroup are distributed randomly to the unvaccinated population of that subgroup. It suggests, using COVID-19 data, that this more accurately captures vaccination dynamics than the model commonly found in the literature. However, as the novel model provides a strictly larger set of possible vaccination policies, the results presented in this paper hold for both models.

**Keywords:** Vaccination, Epidemiology, Epidemics, SIR Modelling

## 1 Introduction

The COVID-19 pandemic has illustrated the importance of quickly implementing vaccination policies which target particular groups within a population [Fitzpatrick and Galvani \(2021\)](#). The difference in final infections between targeted policies and uniform distribution to the entire population can be significant [Castro and Singer \(2021\)](#), [Estadilla et al \(2021\)](#) and so it is important that the models underlying these decisions provide realistic predictions of the outcomes of different policies.

One of the most commonly used models to forecast epidemics is the multi-group SIR (Susceptible-Infected-Recovered) model [Ram and Schaposnik \(2021\)](#), [Acemoglu et al \(2021\)](#), [Kuniya \(2019\)](#). This model divides the population into different groups based on characteristics such as age or occupation. Each group is then further sub-divided into categories of susceptible, infected and recovered. Where vaccination does not give perfect immunity, further sub-categorization based on vaccination status can also be used [Kuga and Tanimoto \(2018\)](#), as will be done in this paper.

While many other approaches have been developed either by adding compartments to the SIR framework [Moore et al \(2021\)](#) or using completely different models such as networks [Chen and Sun \(2014\)](#) or stochastic simulations [Ball and Lyne \(2002\)](#), the multi-group SIR model remains popular because of its comparatively small number of parameters and its relatively simple construction and solution. In this paper, attention will thus be restricted to the multi-group SIR model, although it would be beneficial for future work to consider a wider range of disease models.

There are two general frameworks that are used to model optimal vaccination policies in a resource-limited setting. The first, used in papers such as [Hill and Longini Jr \(2003\)](#) and [Becker and Starczak \(1997\)](#), seeks to reduce the reproduction number,  $R_0$  of the epidemic as much as possible by vaccinating before infections arrive in a population. It is simple to show that in this case, one should use all of the vaccinations available, and so this problem will not be considered further in this paper.

The second framework, used in papers such as [Acemoglu et al \(2021\)](#) and [Hansen and Day \(2011\)](#) aims to minimise the total cost of an epidemic. This is the framework that will be discussed in this paper. The “cost” of an epidemic is, in general, defined to be the number of deaths (or equivalently, infections), with many papers also considering the cost of vaccination alongside the cost of other control measures, such as isolation, lockdown or treatment [Fu et al \(2022\)](#).

One important principle which underlies all of these vaccination policies is the acceptance that giving people their first dose of vaccine as soon as possible reduces the number of infections. Of course, this only holds when the timescale considered is sufficiently short for effects such as waning immunity and disease seasonality to be negligible, and a more complicated framework would be needed to model these effects. However, the acceptance of at least short-term optimality of maximal vaccination effort has been highlighted in the

74 COVID-19 pandemic response, as countries began their vaccination programs  
75 as soon as vaccines became available [Mathieu et al \(2021\)](#).

76 To the best of the authors' knowledge, no one has provided a mathematical  
77 proof that in a general, multi-group SIR model with imperfect vaccination, it is  
78 always best to vaccinate people as early as possible. Of course, it is not difficult  
79 to create a conceptually sound justification - vaccinating more people means  
80 that fewer people will catch the disease which will reduce the total number  
81 of infections. However, the SIR model is an approximation of the process of  
82 a disease spreading, and so it is important that it obeys this principle for all  
83 physical parameter values and vaccination policies.

84 Some special cases of the theorem presented in this paper have been pre-  
85 viously proved in the literature. In particular, a significant number of papers  
86 have considered the optimal vaccination policy for a homogeneous population,  
87 with [Abakuks \(1972\)](#) first proving that, in this case, it is optimal to vaccinate at  
88 maximal effort (if one ignores the cost of vaccination). This proof held for vacci-  
89 nation policies that were finite sums of point mass "impulse" vaccinations, and  
90 has been generalised by papers such as [Hansen and Day \(2011\)](#), [Zaman et al \(2008\)](#),  
91 [Morton and Wickwire \(1974\)](#) and [Zhou et al \(2014\)](#) to a much wider  
92 class of vaccination policies, although the proof was still restricted to a sin-  
93 gle group and to perfect vaccination. Moreover, [Hansen and Day \(2011\)](#) notes  
94 that the case of imperfect vaccination (where vaccinated individuals can still  
95 get infected, although at a lower rate) remained a topic of open investigation,  
96 and so it can not easily be solved using the same methods presented in these  
97 papers. A slight extension is made in [Duijzer et al \(2018\)](#) where it is shown  
98 that maximal effort is optimal in the case of perfect vaccination of any number  
99 of disconnected groups, but the full problem is still far from understood.

100 The general method of proof in the literature relies on Pontryagin's Max-  
101 imum Principle, which is difficult to apply to multi-group models due to the  
102 more complex structure of the equations. It is simple to characterise the solu-  
103 tion in terms of the adjoint variables, as is done in [Zhang et al \(2020\)](#) and  
104 [Zavrakli et al \(2021\)](#) for a two-group model with imperfect vaccination, in  
105 [Boutayeb et al \(2021\)](#) for a general  $n$ -group model with perfect vaccination and  
106 in [Lee et al \(2012\)](#) for a six-group model with imperfect vaccination. However,  
107 determining whether this solution corresponds to the maximal effort solution  
108 in the case of zero vaccination cost requires the analysis of the adjoint ODE  
109 system, which is often just as complicated as the original disease model. In  
110 particular, the fact that vaccinated people need to be no more infectious, no  
111 more susceptible and be infected for no more time than unvaccinated people  
112 means that any analysis of the adjoint system would be complicated, as the  
113 properties of all the constituent parameters would need to be used.

114 Thus, in this paper, a novel approach is developed. Rather than attempting  
115 to use the general optimal control theory methodology, the specific structure  
116 of the SIR equation system is exploited. Using this, an inequality is derived  
117 which shows that if a given vaccination policy,  $\bar{U}$  vaccinates each individual at  
118 least as early as another vaccination policy,  $U$ , then the latter policy will lead

119 to at least as many deaths (or equivalently, infections) as the former. As well  
120 as providing a constraint on the optimal solution, this theorem also highlights  
121 important structural properties of the model, as it shows that the number of  
122 deaths is everywhere non-increasing in the vaccination rates, rather than this  
123 just holding near the optimal solutions.

124 Also introduced in this paper is a more general, and seemingly more accu-  
125 rate, model of vaccination than the one normally used in the literature. The  
126 one that is typically used (in almost all papers cited in this work such as  
127 [Hansen and Day \(2011\)](#), [Zaman et al \(2008\)](#) and [Kar and Batabyal \(2011\)](#))  
128 assumes that the entire population is randomly vaccinated at a controllable  
129 rate. In practice, this is unrealistic, as once a person has been vaccinated  
130 once, that information is available to policy-makers so they can ensure that  
131 only the unvaccinated are given new doses (assuming that only one dose of  
132 the vaccine is required). There can be significant differences between the opti-  
133 mal vaccination policy according to the two models, and so it seems that the  
134 model introduced in this paper should be strongly considered for new optimal  
135 vaccination studies.

136 However, it is shown in this paper that, in the context of the theorems  
137 proved, modifying the model so that vaccines are assigned randomly to the  
138 unvaccinated population provides a strictly larger set of possible vaccination  
139 policies. In particular, this means that the results proved here also apply to  
140 the more commonly-used case, and so can also be used by those following the  
141 more commonly-used vaccination model.

142 Alongside proving that the final infected, recovered and dead populations  
143 are non-increasing with increased and earlier vaccination effort, some caution-  
144 ary contradictions to perhaps intuitive conjectures are also provided which  
145 show the importance of mathematical proof instead of simply intuition. In par-  
146 ticular, it is shown that increased vaccination (under this model) can lead to,  
147 at a fixed finite time of the simulation, higher infection rates or a higher death  
148 count, despite the longer-term better performance of this policy. Indeed, it is  
149 results similar to these which make the proof of the optimality of maximal  
150 effort difficult, as it means that one must be very careful when constructing  
151 the inequalities that do hold for all models.

## 152 **2 Modelling**

### 153 **2.1 Disease Transmission and Vaccination Model**

Suppose that the population is divided into  $n$  subgroups, such that population  
of people in group  $i$  is  $N_i$  and define

$$N := \sum_{i=1}^n N_i.$$

Define the compartments of people as follows, for  $i = 1, \dots, n$ :

$S_i$  := Number of people that are in group  $i$ , are susceptible, and are unvaccinated,

$I_i$  := Number of people that are in group  $i$ , are currently infected, and were infected while unvaccinated,

$R_i$  := Number of people that are in group  $i$ , are recovered or dead, and were infected while unvaccinated,

$S_i^V$  := Number of people that are in group  $i$ , are susceptible and are vaccinated,

$I_i^V$  := Number of people that are in group  $i$ , are infected and were infected after being vaccinated,

$R_i^V$  := Number of people that are in group  $i$ , are recovered or dead and were infected after being vaccinated.

It is assumed that there is a record of people who have received a vaccination and that protection from vaccination does not decay over time, so that no one is vaccinated more than once. Thus, if a total number,  $U_i(t)dt$ , of people in group  $i$  are given vaccines in a small time interval  $(t, t + dt)$ , and these vaccines are distributed randomly to the unvaccinated population in group  $i$ , the total population of susceptibles given vaccines in group  $i$  is

$$U_i(t)dt \times P\left(\text{A person in group } i \text{ is in } S_i \mid \text{A person in group } i \text{ is unvaccinated}\right)$$

which is equal to

$$\frac{U_i(t)dt S_i(t)}{N_i - \int_0^t U_i(s)ds},$$

as  $\int_0^t U_i(s)ds$  is the total population that are in group  $i$  and have been vaccinated before time  $t$ . For the remainder of this section, this vaccination model will be referred to as the “unvaccinated-only” model

This results in the following model, based on SIR principles

$$\begin{aligned} \frac{dS_i}{dt} &= - \sum_{j=1}^n (\beta_{ij}^1 I_j + \beta_{ij}^2 I_j^V) S_i - \frac{U_i(t) S_i}{N_i - W_i(t)}, \\ \frac{dI_i}{dt} &= \sum_{j=1}^n (\beta_{ij}^1 I_j + \beta_{ij}^2 I_j^V) S_i - \mu_i^1 I_i, \\ \frac{dR_i}{dt} &= \mu_i^1 I_i, \\ \frac{dS_i^V}{dt} &= - \sum_{j=1}^n (\beta_{ij}^3 I_j + \beta_{ij}^4 I_j^V) S_i^V + \frac{U_i(t) S_i}{N_i - W_i(t)}, \end{aligned} \tag{1}$$

$$\begin{aligned}\frac{dI_i^V}{dt} &= \sum_{j=1}^n (\beta_{ij}^3 I_j + \beta_{ij}^4 I_j^V) S_i^V - \mu_i^2 I_i^V, \\ \frac{dR_i^V}{dt} &= \mu_i^2 I_i^V,\end{aligned}\tag{2}$$

where

$$W_i(t) := \int_0^t U_i(s) ds.$$

154 Here,  $\beta_{ij}^1$  represents transmission from the unvaccinated members of group  $j$   
 155 to the unvaccinated members of group  $i$ ,  $\beta_{ij}^2$  represents transmission from vac-  
 156 cinated members to unvaccinated members,  $\beta_{ij}^3$  represents transmission from  
 157 vaccinated members to unvaccinated members and  $\beta_{ij}^4$  represents transmission  
 158 from vaccinated members to vaccinated members. Additionally,  $\mu_i^1$  represents  
 159 the infectious period of unvaccinated infected members in group  $i$  while  $\mu_i^2$  rep-  
 160 represents the infectious period of vaccinated members. Note that the superscript  
 161 denotes different parameter values, so that  $\beta_{ij}^2$  is not necessarily the square of  
 162  $\beta_{ij}^1$ .

To ensure that vaccination is “locally effective” (that is, a vaccinated indi-  
 vidual is no more likely to transmit or be infected by the disease, and is  
 infectious for no longer than an unvaccinated individual in the same sub-  
 group), and that the parameters are epidemiologically feasible, the following  
 constraints are imposed:

$$\beta_{ij}^1 \geq \beta_{ij}^2, \beta_{ij}^3 \geq \beta_{ij}^4 \geq 0 \quad \text{and} \quad \mu_i^2 \geq \mu_i^1 > 0$$

163 Note that there is no constraint on the ordering of  $\beta_{ij}^2$  and  $\beta_{ij}^3$ . It is assumed  
 164 for convenience that all variables except the  $S_i$  and  $I_i$  are initially zero and  
 165 that all initial conditions are non-negative.

The equations (1) - (2) sum to zero on the right-hand side, and so for each  
 $i$ ,

$$S_i(t) + I_i(t) + R_i(t) + S_i^V(t) + I_i^V(t) + R_i^V(t) = N_i \quad \forall t \geq 0.\tag{3}$$

It will be assumed that the populations and parameters have been scaled such  
 that  $N = 1$ , Finally, it is assumed that

$$W_i(t) \leq N_i \quad \forall t \geq 0 \quad \text{and} \quad W_i(t) = N_i \Rightarrow \frac{U_i(t) S_i}{N_i - W_i(t)} = 0.$$

166 to ensure feasibility of the vaccination policies.

## 167 2.2 Fully Random Vaccination

A more common model of vaccination in the literature is the “fully random”  
 vaccination model (Hansen and Day (2011), Zaman et al (2008) and Kar and

Batabyal (2011)), where vaccinations assigned to each subgroup are given randomly to all members of that subgroup. That is, the equation (1) becomes

$$\frac{dS_i}{dt} = - \sum_{j=1}^n (\beta_{ij}^1 I_j + \beta_{ij}^2 I_j^V) S_i - U_i^*(t) S_i,$$

168 where  $U_i^*(t)$  is the vaccination rate in this model.

Dimensional analysis reveals that that  $U_i^*(t)$  has dimension  $\frac{1}{[\text{time}]}$ , unlike  $U_i(t)$  (which has dimension  $\frac{[\text{people}]}{[\text{time}]}$ ). Thus,  $U_i(t)dt$  is the number of vaccines given in a small time interval  $[t, t + dt]$ , while  $U_i^*(t)$  instead is the proportion of the population that are given vaccines in this interval. Thus, the number of vaccinations assigned by the fully random model in the small time interval  $[t, t + dt]$  is  $N_i U_i^*(t)dt$ . This model then corresponds to random vaccination as

$$\begin{aligned} U_i^*(t) S_i dt &= N_i U_i^*(t) dt \times \frac{S_i}{N_i} \\ &= (\text{Doses given to group } i) \times (\text{Susceptible proportion of group } i). \end{aligned}$$

169 As in Zaman et al (2008),  $U_i^*(t)$  can equivalently be interpreted as the per-  
170 centage of susceptibles being vaccinated per unit time. However, even with this  
171 interpretation, Zaman et al (2008) constrains  $U_i^*(t)$  to be less than a fixed, con-  
172 stant value. This is still in line with the random vaccination interpretation, as  
173 this constraint could again be interpreted as simply the number of randomly-  
174 assigned vaccines that are “successful” in being given to susceptibles, given an  
175 overall constant rate of vaccination to the whole population.

## 176 2.3 Justification of the Unvaccinated-Only Model

177 A significant problem with the fully random model is that it assumes that the  
178 number of vaccines wasted when vaccinating a population grows very quickly as  
179 more people are vaccinated. For example, in a (mostly susceptible) population  
180 that has 50% vaccination coverage, then it assumed that it will take twice  
181 as much effort to vaccinate the same number of people as at the start of  
182 program. This seems unrealistic given the vaccination uptake for COVID-19,  
183 where demand remained high until a large proportion of the population had  
184 been vaccinated, as shown in Ritchie et al (2020). Moreover, Aubrey et al  
185 (2022) shows that in Canada, the number of wasted vaccines was 2.6% of the  
186 total given out when their adult population had been mostly vaccinated (at  
187 least once) in November 2021, and so it is not the case that the vaccine wastage  
188 scales in the way predicted by the fully random model.

Figure 1, made from the data used in Ritchie et al (2020) and created in Mathieu et al (2021) gives an explicit example of this. It compares the median time taken (in the 27 countries from the dataset that recorded their data in the same way) to give a first vaccine dose to different 10% percentiles of the population that were over 80 years old in each country. As a baseline, it uses

the time taken to move from 20% vaccination coverage of this age group to 30% coverage (to avoid errors from the very small but rapidly growing initial vaccine supply). The median values shown in the figure are the median of the times

$$\frac{(\text{Time taken to move from } x\% \text{ to } (x + 10)\% \text{ coverage})}{(\text{Time taken to move from 20\% to 30\% coverage})}$$

across the 27 different countries, where  $x$  denotes the value on the  $x$  axis. Assuming that vaccination effort was roughly constant in the period during which these vaccinations occurred (which is not a completely accurate assumption, but in general, those aged over 80 years were given their first doses in a short period of time), one would then expect that these proportions would be equal to 1 for all  $x$  under the unvaccinated-only model. However, under the fully random model, significantly more effort is required to vaccinate people once the total percentage vaccinated is higher. Indeed, if  $X$  is the unvaccinated percentage then one has (assuming  $U_i^*(t)$  is a constant)

$$\frac{dX}{dt} = -U_i^* X,$$

and hence

$$X(t) = X(0)e^{-U_i^* t} \Rightarrow t = \frac{1}{U_i^*} \log \left( \frac{X(t)}{X(0)} \right).$$

189 These predicted times according to the random model are given by the red  
190 line in Figure 1.



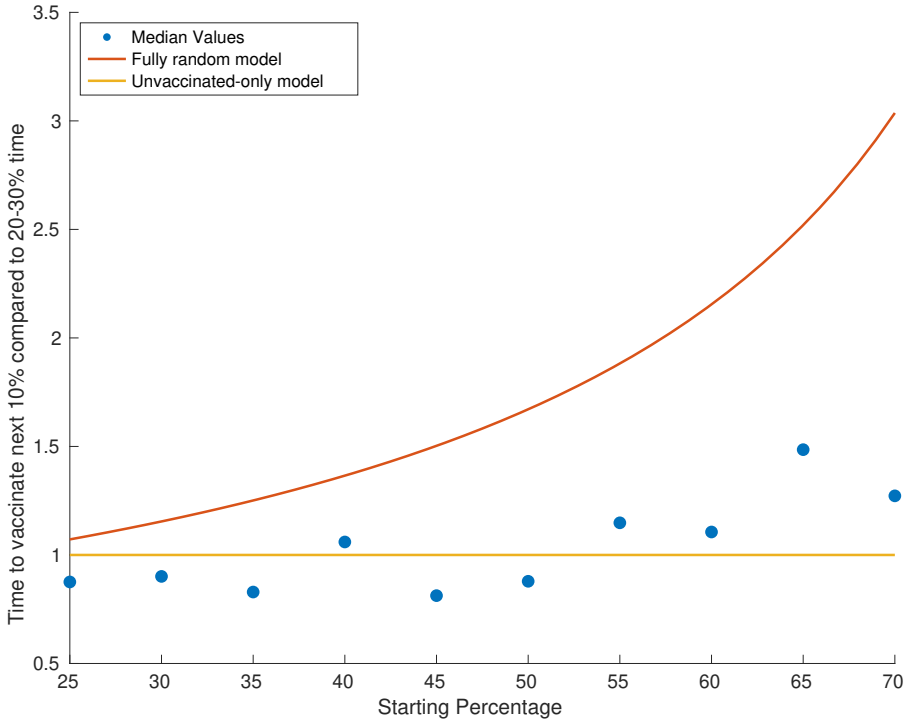

**Fig. 1** A comparison of the expected time to vaccinate the next 10% of those aged over 80 years according to the fully random model, unvaccinated-only model and median values from data taken from 27 countries.

191 It is clear from Figure 1 that the constant-time-interval model provides a  
 192 much better prediction of the median time intervals from the data. Of course, it  
 193 is important to model the fact that a significant proportion of each group in the  
 194 population will remain unvaccinated, and that rates of uptake will decrease as  
 195 the number of unvaccinated people decreases, evidence of which is apparent in  
 196 Figure 1. However, both models could easily be modified to (more accurately)  
 197 incorporate the fact that not everyone will get vaccinated by constraining  
 198  $W_i(t) \leq \alpha_i N_i$  for some  $\alpha_i < 1$ . Furthermore, the demand could be modelled  
 199 by introducing some general constraint  $U_i(t) \leq K(W_i(t), t)$  which would again  
 200 more accurately model this phenomenon.

201 Thus, it seems that the unvaccinated-only model does give a more accurate  
 202 representation of a vaccination program than the more traditional random  
 203 model, although more detailed analysis would be needed to justify this further.  
 204 Therefore, future studies should consider carefully their choice of vaccination  
 205 function to ensure that their results are as practically applicable as possible.

## 206 2.4 The Importance of Choosing the Correct Model

The distinction between the two models is important, as there are many examples where the two models will give significantly different solutions to the

optimal vaccination problem. Consider a two-group case with perfect vaccination (so  $\beta_{ij}^\alpha = 0$  for  $\alpha > 1$ ) with  $N_1 = N_2 = 1$  (which means that  $U_i^*$  and  $U_i$  are constrained in the same way). Then, suppose the parameters are

$$\beta^1 = \begin{pmatrix} 4 & 0.5 \\ 0.5 & 0.25 \end{pmatrix} \quad \mu^1 = \begin{pmatrix} 1 \\ 1 \end{pmatrix} \quad \mathbf{S}(0) = \begin{pmatrix} 1 - 10^{-4} \\ 1 - 10^{-4} \end{pmatrix} \quad \mathbf{I}(0) = \begin{pmatrix} 10^{-4} \\ 10^{-4} \end{pmatrix} \quad \mathbf{p} = \begin{pmatrix} 0 \\ 1 \end{pmatrix}$$

where  $\mathbf{p}$  is the case fatality ratio in each group. Suppose that the objective is to minimise the final number of deaths, given by  $R_2(\infty)$ . Moreover, suppose that the overall vaccination rate is given by

$$U_1(t) + U_2(t) = U_1^*(t) + U_2^*(t) = \begin{cases} 10 & \text{if } t < 0.08 \\ 0 & \text{otherwise} \end{cases}$$

207 so that vaccination takes place almost instantly. Suppose that one has the  
 208 choice between vaccinating exactly group 1 or group 2 at maximum rate until  
 209 the supply runs out. Then, under the random vaccination model, it is not  
 210 possible to reach herd immunity by vaccinating the infectious group 1, and so  
 211 the optimal strategy is to vaccinate group 2. However, in the unvaccinated-  
 212 only model it *is* possible to reach herd immunity and the optimal strategy  
 213 is to vaccinate group 1. Indeed, if the random model is used to make the  
 214 decision, but the unvaccinated-only model is the actual population response  
 215 to vaccination, then the wrong decision is made and the number of deaths  
 216 increases from  $7 \times 10^{-4}$  to 0.08. Thus, it is clearly important to ensure that  
 217 the correct model is chosen.

## 2.5 Globality of Results in This Paper

218 However, the principle of maximal vaccination effort will hold for both models of vaccination, which can be shown as follows. The two models are equivalent whenever

$$\frac{U_i(t)}{N_i - W_i(t)} = U_i^*(t) \Rightarrow \frac{d}{dt} \left( \log(N_i - W_i(t)) + W_i^*(t) \right) = 0, \quad (4)$$

where

$$W_i^*(t) := \int_0^t U_i^*(s) ds.$$

Thus, by integrating (4), and noting that  $W_i^*(0) = W_i(0) = 0$

$$\log(N_i - W_i(t)) + W_i^*(t) = \log(N_i)$$

and so

$$W_i(t) = N_i(1 - e^{-W_i^*(t)}).$$

219 Thus, given any fully random vaccination policy  $\mathbf{U}^*$ , it can be replaced by a  
 220 unvaccinated-only policy  $\mathbf{U}$  (although the converse does not hold as  $W_i(t) =$   
 221  $N_i$  requires  $W_i^*(t) = \infty$ ).

222 Moreover, note that  $W_i^*(t)$  is increasing in  $W_i(t)$ . Thus, if a pair of fully ran-  
223 dom vaccination policies  $\mathbf{U}$  and  $\tilde{\mathbf{U}}$  satisfy  $W_i(t) \leq \tilde{W}_i(t)$  then this inequality is  
224 preserved by the corresponding unvaccinated-only policies as  $W_i^*(t) \leq \tilde{W}_i^*(t)$ .  
225 This property means that the theorems proved in this paper will hold for both  
226 models (as they will be proved using an “unvaccinated only” model).

## 227 3 Optimisation Problem

228 Now that the model has been formulated, it is possible to set up the  
229 optimisation problem that will be considered in the remainder of this paper.

### 230 3.1 Constraints on $U_i(t)$

231 In order to assist the proof of the theorems, it is necessary to make some  
232 (unrestrictive) assumptions on the vaccination rates,  $U_i(t)$ .

Firstly, there are the physical constraints that for each  $i \in \{1, \dots, n\}$

$$233 \quad U_i(t) \geq 0 \quad \text{and} \quad \int_0^t U_i(s) ds \leq N_i \quad \forall t \geq 0. \quad (5)$$

234 It is also necessary that  $U_i(t)$  is within the class of functions such that solutions  
235 to the model equations exist and are unique. Discussion of the exact conditions  
236 necessary for this to hold is outside the scope of this paper. However, from the  
237 Picard-Lindelöf Theorem [Collins \(2006\)](#), a sufficient condition for this is that  
238  $U_i(t)$  is a piecewise Lipschitz continuous function. While this is not a necessary  
239 condition, this illustrates that this assumption will hold for a large class of  
240 functions. However, it will be helpful throughout the course of the proof to  
241 explicitly assume two conditions on  $U_i(t)$  - namely, that it is bounded and that  
242 it is Lebesgue integrable on  $\mathfrak{R}$  for each  $i$ .

243 For the remainder of this paper, define the set of feasible vaccination poli-  
244 cies,  $C$ , is the set of functions  $\mathbf{U}$  satisfying (5) such that unique solutions to  
245 the model equations exist with these functions as the vaccination policy and  
such that each  $U_i(t)$  is bounded and Lebesgue integrable on  $\mathfrak{R}$ .

### 246 3.2 Optimisation Problem

The aim is to choose the vaccination policy  $\mathbf{U} \in C$  such that the total number  
of deaths (or any linear function of the infections in each subgroup) is min-  
imised while meeting additional constraints on vaccine supply and vaccination  
rate. It is assumed that the maximal rate of vaccination at time  $t$  is  $A(t)$  and  
that there is a total (non-decreasing) supply of  $B(t)$  vaccinations that has  
arrived by time  $t$ . Thus, for each  $i$ ,  $U_i(t)$  is constrained to satisfy

$$\sum_{i=1}^n U_i(t) \leq A(t) \quad \text{and} \quad \sum_{i=1}^n W_i(t) \leq B(t).$$

It is assumed that each infection of unvaccinated people in group  $i$  is weighted by some  $p_i$  (this could be interpreted as a probability of death, hospitalisation or, if  $p_i = 1$ , simply counting the number of infections). Moreover, it is assumed that the infection is no more serious for those that have been vaccinated, so that the weighting of an infection of a vaccinated person in group  $i$  is  $p_i \kappa_i$ , where  $\kappa_i \leq 1$ . Thus, the objective function is

$$H(\mathbf{U}) := \sum_{i=1}^n p_i \left( R_i(\infty) + \kappa_i R_i^V(\infty) \right)$$

where, for example

$$R_i(\infty) = \lim_{t \rightarrow \infty} (R_i(t)).$$

Note these limits exist as  $R_i$  is non-decreasing and bounded by Lemma B.3. Hence, the optimisation problem is

$$\min \left\{ \sum_{i=1}^n p_i \left( R_i(\infty) + \kappa_i R_i^V(\infty) \right) : \sum_{i=1}^n U_i(t) \leq A(t), \quad \sum_{i=1}^n W_i(t) \leq B(t) \quad \forall i, t, \dots \right. \\ \left. \text{and } \mathbf{U} \in C \right\}. \quad (6)$$

## 247 4 Main Results

248 The main results of this paper are as follows. Firstly, it is shown that the  
249 objective function is non-increasing in vaccination effort.

**Theorem 1.** *Suppose that  $\mathbf{U}, \tilde{\mathbf{U}} \in C$ . Suppose further that for each  $i \in \{1, \dots, n\}$  and  $t \geq 0$*

$$\int_0^t U_i(s) ds \leq \int_0^t \tilde{U}_i(s) ds$$

Then

$$H(\mathbf{U}) \geq H(\tilde{\mathbf{U}}).$$

250 Then, it is shown that if an optimal solution exists, there is an optimal  
251 maximal effort solution.

**Theorem 2.** *Suppose that  $B$  is differentiable, and that there is an optimal solution  $\mathbf{U}$  to (6). Then, define the function*

$$\chi(t) := \begin{cases} A(t) & \text{if } \int_0^t \chi(s) ds < B(t) \\ \min(A(t), B'(t)) & \text{if } \int_0^t \chi(s) ds \geq B(t) \end{cases}$$

and suppose that  $\chi(t)$  exists and is bounded. Then, there exists an optimal solution  $\tilde{\mathbf{U}}$  to the problem (6) such that

$$\sum_{i=1}^n \tilde{W}_i(t) = \max \left( \int_0^t \chi(s) ds, 1 \right).$$

Moreover, if  $\chi(t)$  is continuous almost everywhere, there exists an optimal solution  $\tilde{\mathbf{U}}$  such that

$$\sum_{i=1}^n \tilde{U}_i(t) = \begin{cases} \chi(t) & \text{if } \int_0^t \chi(s) ds < 1 \\ 0 & \text{otherwise} \end{cases}$$

252 It is perhaps concerning to the reader that the existence of  $\chi$  is left as  
 253 an assumption in this theorem. However, while the exact conditions on its  
 254 existence are beyond the scope of this paper, it certainly exists for a wide class  
 255 of functions  $A(t)$  and  $B(t)$ , as proved in Lemma A.11.

256 Finally, it is shown that this principle still holds if the cost of vaccination  
 257 is considered.

**Theorem 3.** Under the assumptions of Theorem 2, consider a modified objective function  $\mathcal{H}$  given by

$$\mathcal{H}(\mathbf{U}) = H(\mathbf{U}) + F(\mathbf{W}(\infty))$$

for any function  $F$ . Then, with  $\chi$  defined to be the maximal vaccination effort as in Theorem 2, there exists an optimal solution  $\tilde{\mathbf{U}}$  such that, for some  $\tau \geq 0$

$$\sum_{i=1}^n \tilde{W}_i(t) = \begin{cases} \int_0^t \chi(s) ds & \text{if } t \leq \tau \\ W_i(\tau) & \text{otherwise} \end{cases}.$$

Moreover, if  $\chi$  is continuous almost everywhere, then there is an optimal solution  $\tilde{\mathbf{U}}$  such that

$$\sum_{i=1}^n \tilde{U}_i(t) = \begin{cases} \chi(t) & \text{if } t \leq \tau \\ 0 & \text{otherwise} \end{cases}.$$

## 258 5 Proof

Before beginning the main proof, it is helpful to note some fundamental results about the SIR equations that will be used throughout. Namely, for each  $i \in \{1, \dots, n\}$  and  $t \geq 0$

$$0 \leq S_i(t), I_i(t), R_i(t), S_i^V(t), I_i^V(t), R_i^V(t) \leq N_i$$

and

$$\lim_{t \rightarrow \infty} (I_i(t)) = \lim_{t \rightarrow \infty} (I_i^V(t)) = 0$$

259 These results are proved in Lemmas B.3 and B.4.

It is first useful to define

$$K_{ij}(t) = \frac{\beta_{ij}^1}{\mu_j^1} R_j(t) + \frac{\beta_{ij}^2}{\mu_j^2} R_j^V(t)$$

and

$$L_{ij}(t) := \frac{\beta_{ij}^3}{\mu_i^1} R_j(t) + \frac{\beta_{ij}^4}{\mu_i^2} R_j^V(t).$$

260 Then, the following propositions hold.

## 261 5.1 An Inequality for $K_{ij}$ and $L_{ij}$

262 Note that the proof of this proposition requires a significant amount of algebra,  
 263 and the majority of it has hence been left to lemmas which can be found in  
 264 Appendix A. However, the key logic of the proof will be presented here.

265 Also, note that in this paper, a step function is defined to be a function  
 266 that is piecewise constant on any *bounded* interval of  $\mathfrak{R}$ . Thus, it may have  
 267 infinitely many discontinuities, but only finitely many in any bounded interval.  
 268 This differs from the definition used in some other papers (which impose that  
 269 a step function is piecewise constant on  $\mathfrak{R}$ ).

**Proposition 1.** *Suppose that  $U_i(t)$  and  $\tilde{U}_i(t)$  are right-continuous step functions. Moreover, suppose that*

$$\beta_{ij}^1 > \beta_{ij}^3 > 0 \quad \forall i, j \in \{1, \dots, n\},$$

$$S_i(0)I_i(0) > 0 \quad \forall i \in \{1, \dots, n\}.$$

and that

$$W_i(t) < N_i \quad \forall t \geq 0 \quad \text{and} \quad \forall i \in \{1, \dots, n\}$$

Then,

$$K_{ij}(t) \geq \tilde{K}_{ij}(t) \quad \text{and} \quad L_{ij}(t) \geq \tilde{L}_{ij}(t) \quad \forall t \geq 0.$$

**Proof:** Suppose that the proposition does not hold. Hence, one can define

$$T := \inf \left\{ t : K_{ij}(t) < \tilde{K}_{ij}(t) \quad \text{or} \quad L_{ij}(t) < \tilde{L}_{ij}(t) \quad \text{for some } i, j \in \{1, \dots, n\} \right\}.$$

Then, there exists some  $b \in \{1, \dots, n\}$  and some real constants  $\kappa$  and  $\eta$  such that the following system of inequalities holds at time  $T$ :

$$S_b(T) + S_b^V(T) \leq \tilde{S}_b(T) + \tilde{S}_b^V(T), \tag{7}$$

$$I_b(T) + R_b(T) \geq \tilde{I}_b(T) + \tilde{R}_b(T) \tag{8}$$

$$R_b(T) \geq \tilde{R}_b(T), \quad (9)$$

$$R_b(T) + \kappa R_b^V(T) \leq \tilde{R}_b(T) + \kappa \tilde{R}_b^V(T), \quad (10)$$

$$I_b(T) + \eta I_b^V(T) \leq \tilde{I}_b(T) + \eta \tilde{I}_b^V(T), \quad (11)$$

$$0 \leq \kappa \leq \eta \leq 1. \quad (12)$$

The derivations of inequalities (7) - (12) are found in Lemmas A.2 - A.5. Moreover,

$$\begin{aligned} S_b(T) + I_b(T) + R_b(T) + S_b^V(T) + I_b^V(T) + R_b^V(T) = \\ \tilde{S}_b(T) + \tilde{I}_b(T) + \tilde{R}_b(T) + \tilde{S}_b^V(T) + \tilde{I}_b^V(T) + \tilde{R}_b^V(T), \end{aligned} \quad (13)$$

270 which comes from (3). Note that (10) in fact holds to equality in this case,  
271 but this is not necessary for the proof (and later, the same system will be  
272 considered where such an equality is not guaranteed).

By Lemma A.6, the system (7) - (13) implies that

$$I_b(T) + R_b(T) = \tilde{I}_b(T) + \tilde{R}_b(T), \quad (14)$$

$$I_b^V(T) + R_b^V(T) = \tilde{I}_b^V(T) + \tilde{R}_b^V(T), \quad (15)$$

$$S_b(T) + S_b^V(T) = \tilde{S}_b(T) + \tilde{S}_b^V(T), \quad (16)$$

If  $T > 0$ , then Lemma A.7 can be used to show that

$$W_k(t) = \tilde{W}_k(t) \quad \forall t \in [0, T] \quad \text{and} \quad \forall k \in \{1, \dots, n\}$$

273 while if  $T = 0$  then this is immediate. Thus, the two ODE systems are the  
274 same up to time  $T$ , which means that all variables (in all groups) are equal at  
275 time  $T$ .

276 From this point, the proof of Proposition 1 can be completed by considering  
277 the behaviour of the system at time  $T + \delta$  for small  $\delta$ . For sufficiently small  $\delta$ ,  
278  $U_i(t)$  and  $\tilde{U}_i(t)$  are constant on  $[T, T + \delta]$  (as they are step functions) and this  
279 condition on  $\delta$  will be assumed for the remainder of this proof

Define functions  $\Delta_i^f$  to be

$$\Delta_i^f(t) := f_i(T + t) - \tilde{f}_i(T + t) \quad \text{for} \quad f \in \{S, I, R, S^V, I^V, R^V, W\}$$

and note that

$$\Delta_i^f(0) = 0 \quad \forall f \in \{S, I, R, S^V, I^V, R^V, W\}.$$

Then, by Lemma A.8, for  $t \in [0, \delta]$  and any real numbers  $x$  and  $y$

$$\frac{x}{\mu_i^1} \Delta_i^R + \frac{y}{\mu_i^2} \Delta_i^{R^V} = \frac{t^3 S_i(T)(U_i(T) - \tilde{U}_i(T))}{6(N_i - W_i(T))} \left[ x \sum_{j=1}^n (K'_{ij}(T)) - y \sum_{j=1}^n (L'_{ij}(T)) \right] + O(\delta^4).$$

Hence, by Lemma A.9,

$$\sum_{j=1}^n K_{ij}(t) \geq \sum_{j=1}^n \tilde{K}_{ij}(t) \quad \forall t \in [0, T + \delta] \quad (17)$$

and

$$\sum_{j=1}^n L_{ij}(t) \geq \sum_{j=1}^n \tilde{L}_{ij}(t) \quad \forall t \in [0, T + \delta] \quad (18)$$

280 for sufficiently small  $\delta$ .

Now, by the definition of  $T$ , there exists some  $t$  in  $[T, T + \delta]$  such that, for some  $a, b$

$$K_{ab}(t) < \tilde{K}_{ab}(t) \quad \text{or} \quad L_{ab}(t) < \tilde{L}_{ab}(t).$$

Indeed, from Lemma A.10, there exists some  $t \in (T, T + \delta)$  such that

$$R_b(t) + \kappa R_b^V(t) < \tilde{R}_b(t) + \kappa \tilde{R}_b^V(t) \quad \text{and} \quad I_b(t) + \eta I_b^V(t) \leq \tilde{I}_b(t) + \eta \tilde{I}_b^V(t) \quad (19)$$

for some

$$0 \leq \kappa \leq \eta \leq 1. \quad (20)$$

Now, by Lemmas A.2 - A.4 (which only require the properties (17) and (18)), the system of inequalities (7)-(9) holds for group  $b$  at time  $t$ . These can be combined with (19), (20) and (13) to use Lemma A.6, showing

$$\eta I_b^V(t) + \kappa R_b^V(t) = \eta \tilde{I}_b^V(t) + \kappa \tilde{R}_b^V(t) \quad (21)$$

$$I_b(t) + R_b(t) = \tilde{I}_b(t) + \tilde{R}_b(t). \quad (22)$$

By adding the inequalities in (19) together,

$$R_b(t) + \kappa R_b^V(t) + I_b(t) + \eta I_b^V(t) < \tilde{R}_b(t) + \kappa \tilde{R}_b^V(t) + \tilde{I}_b(t) + \eta \tilde{I}_b^V(t).$$

281 Then, (21) and (22) show that this must in fact be an equality which is  
 282 a contradiction. Thus,  $t$  cannot exist. This provides a contradiction to the  
 283 definition of  $T$ , and hence finishes the proof of Proposition 1.

284

285 It is now possible to prove Theorem 1 under the extra restrictions given  
 286 Proposition 1.

## 287 5.2 A Proof for a Restricted Parameter and Policy Set

**Proposition 2.** *Under the conditions of Proposition 1, for any  $t \geq 0$  and  $i \in \{1, \dots, n\}$*

$$I_i(t) + I_i^V(t) + R_i(t) + R_i^V(t) \geq \tilde{I}_i(t) + \tilde{I}_i^V(t) + \tilde{R}_i(t) + \tilde{R}_i^V(t)$$

and

$$R_i(t) \geq \tilde{R}_i(t).$$



Moreover, for any  $\lambda \in [0, 1]$

$$R_i(\infty) + \lambda R_i^V(\infty) \geq \tilde{R}_i(\infty) + \lambda \tilde{R}_i^V(\infty)$$

288 and hence, the objective function is lower for  $\tilde{U}$ , provided the conditions of  
289 Proposition 1 are met.

**Proof:** Note that, by Proposition 1,

$$K_{ij}(t) \geq \tilde{K}_{ij}(t) \quad \text{and} \quad L_{ij}(t) \geq \tilde{L}_{ij}(t) \quad \forall t \geq 0$$

and hence, by Lemma A.2, for each  $i \in \{1, \dots, n\}$

$$S_i(t) + S_i^V(t) \leq \tilde{S}_i(t) + \tilde{S}_i^V(t).$$

Combining this with the conservation of population equation, (13), shows that

$$I_i(t) + I_i^V(t) + R_i(t) + R_i^V(t) \geq \tilde{I}_i(t) + \tilde{I}_i^V(t) + \tilde{R}_i(t) + \tilde{R}_i^V(t)$$

as required. Now, taking  $t \rightarrow \infty$  and noting that the infections tend to zero by Lemma B.4 gives

$$R_i(\infty) + R_i^V(\infty) \geq \tilde{R}_i(\infty) + \tilde{R}_i^V(\infty).$$

Moreover, by Lemma A.5, for any  $t \geq 0$  and  $i \in \{1, \dots, n\}$

$$R_i(t) \geq \tilde{R}_i(t)$$

as required. Also, taking  $t \rightarrow \infty$  shows that

$$R_i(\infty) \geq \tilde{R}_i(\infty).$$

Thus, for any  $\lambda \in [0, 1]$

$$\begin{aligned} R_i(\infty) + \lambda R_i^V(\infty) &= (1 - \lambda)R_i(\infty) + \lambda(R_i(\infty) + R_i^V(\infty)) \\ &\geq (1 - \lambda)\tilde{R}_i(\infty) + \lambda(\tilde{R}_i(\infty) + \tilde{R}_i^V(\infty)) \\ &= \tilde{R}_i(\infty) + \lambda \tilde{R}_i^V(\infty) \end{aligned}$$

290 as required.

291

292 By summing the  $i$  inequalities at  $t = \infty$  from Proposition 2 (and using  
293  $\lambda = \kappa_i$ ), Theorem 1 holds under the additional conditions given in Proposition  
294 1. Note that the closure of the set of parameters, initial conditions and vac-  
295 cination policies which satisfy these conditions is the original set specified in  
296 Theorem 1. Thus, one can generalise the result with the help of the following  
297 proposition.

298 **5.3 Continuous Dependence**

**Proposition 3.** *Define the set of functions*

$$\mathcal{F} := \left\{ S_i(t; \epsilon), I_i(t; \epsilon), R_i(t; \epsilon), S_i^V(t; \epsilon), I_i^V(t; \epsilon), R_i^V(t; \epsilon) : i \in \{1, \dots, n\}, \quad \epsilon, t \geq 0 \right\},$$

where for each fixed  $\epsilon$ , these functions solve the model equations with parameters

$$\mathcal{P} = \left\{ \beta_{ij}^\alpha(\epsilon), \mu_i^\gamma(\epsilon) : i, j \in \{1, \dots, n\}, \quad \alpha \in \{1, 2, 3, 4\}, \quad \gamma \in \{1, 2\} \quad \text{and} \quad \epsilon \geq 0 \right\},$$

initial conditions

$$\mathcal{I} = \left\{ f(0; \epsilon) : i \in \{1, \dots, n\}, \quad f \in \mathcal{F} \quad \text{and} \quad \epsilon \geq 0 \right\}$$

and vaccination policy  $U(t; \epsilon)$ . Suppose that

$$|p(\epsilon) - p(0)| \leq \epsilon \quad \forall p \in \mathcal{P},$$

$$|f_i(0; \epsilon) - f_i(0; 0)| \leq \epsilon \quad \forall f \in \mathcal{F}$$

and that

$$|W_i(t, \epsilon) - W_i(t, 0)| < \epsilon \quad \forall t \geq 0.$$

Moreover, suppose that for each  $i \in \{1, \dots, n\}$  and  $\epsilon \geq 0$ ,

$$U_i(s; \epsilon) \geq 0 \quad \text{and} \quad \int_0^t U_i(s; \epsilon) ds \leq N_i \quad \forall t \geq 0.$$

Then, for each  $\delta > 0$  and each  $T > 0$  there exists some  $\eta > 0$  (that may depend on  $T$  and  $\delta$ ) such that

$$\epsilon \in (0, \eta) \Rightarrow |f(t; \epsilon) - f(t; 0)| < \delta \quad \forall f \in \mathcal{F} \quad \text{and} \quad \forall t \in [0, T]$$

299 **Proof:** The proof is simple but algebraically dense and so is left to Lemma  
300 B.8 in the appendices.

301

302 This now allows a proof of Theorem 1 to be formed.

303 **5.4 Theorem 1**

**Theorem 1.** *Suppose that  $U, \tilde{U} \in C$ . Suppose further that for each  $i \in \{1, \dots, n\}$  and  $t \geq 0$*

$$\int_0^t U_i(s) ds \leq \int_0^t \tilde{U}_i(s) ds.$$

Then

$$H(U) \geq H(\tilde{U}).$$

**Proof:** Define the parameters  $\beta_{ij}^a(\epsilon)$  and  $\mu_i^a(\epsilon)$  by

$$\beta_{ij}^a(\epsilon) = \beta_{ij}^a + \frac{\epsilon}{a} \quad \text{and} \quad \mu_i^a(\epsilon) = \mu_i^a.$$

This means that, for any  $\epsilon > 0$ , these parameters satisfy the conditions of Propositions 1 and 2. Define, for  $\epsilon < 1$ , the initial conditions

$$S_i(0; \epsilon) = \begin{cases} S_i(0; 0) & \text{if } S_i(0; 0), I_i(0; 0) > 0 \\ S_i(0; 0) + \epsilon N_i & \text{if } S_i(0; 0) = 0 \\ S_i(0; 0) - \epsilon N_i & \text{if } I_i(0; 0) = 0 \end{cases}$$

and

$$I_i(0; \epsilon) = N_i - S_i(0; \epsilon).$$

304 Then, the conditions of Propositions 1 and 2 are met by these initial conditions  
305 for any  $\epsilon > 0$ .

Now, define the set of points

$$\sigma(\epsilon) := \left\{ n\epsilon : n \in \mathcal{N}_{\geq 0} \right\}.$$

Then, define  $W_i^*(t; \epsilon)$  to be the first order approximation to the function  $\mathcal{W}_i(t; \epsilon) := \max(W_i(t), N_i - \epsilon)$  using the points of  $\sigma(\epsilon)$ . That is, for each  $t$  define

$$K(t; \epsilon) := \inf \left\{ m : m \in \sigma(\epsilon) \quad \text{and} \quad m \geq t \right\}$$

and

$$k(t; \epsilon) := \sup \left\{ m : m \in \sigma(\epsilon) \quad \text{and} \quad m \leq t \right\}$$

Note that, as  $\sigma(\epsilon)$  is nowhere dense, one must have

$$k(t; \epsilon), K(t; \epsilon) \in \sigma(\epsilon) \quad \text{and} \quad k(t; \epsilon) \leq t \leq K(t; \epsilon)$$

Then, define

$$W_i^*(t; \epsilon) = (t - k(t; \epsilon))\mathcal{W}_i(k(t; \epsilon); \epsilon) + (K(t; \epsilon) - t)\mathcal{W}_i(K(t; \epsilon); \epsilon).$$

Thus, as  $k$  and  $K$  are constant on any interval not containing a point in  $\sigma(\epsilon)$ ,  $W_i^*$  is linear on any interval not containing a point of  $\sigma(\epsilon)$  and so its derivative is a step function.

Now, note that, for each  $t$

$$|\mathcal{W}_i(t; \epsilon) - W_i^*(t; \epsilon)| \leq \epsilon$$

and, moreover,

$$t \in S \Rightarrow W_i^*(t; \epsilon) = \mathcal{W}_i(t; \epsilon).$$

306 Also, as  $U_i$  is bounded, each  $W_i$  (and hence each  $\mathcal{W}_i$ ) are Lipschitz contin-  
 307 uous with some Lipschitz constant  $L$ . Moreover, each  $W_i^*$  is continuous and  
 308 is differentiable in each interval  $(k(t; \epsilon), K(t; \epsilon))$  with a maximal (uniformly  
 309 bounded) gradient of  $U_i(t)$ , meaning that  $W_i^*$  is also Lipschitz continuous with  
 310 Lipschitz constant  $L$ .

It can now be shown that  $|W_i(t) - W_i^*(t; \epsilon)|$  is uniformly bounded in  $t$ .  
 For each  $t \geq 0$ , one can find an element  $s \in \sigma(\epsilon)$  such that  $|t - s| < \epsilon$ . Then,

$$\begin{aligned} |W_i(t) - W_i^*(t; \epsilon)| &\leq |W_i(t) - W_i(s)| + |W_i(s) - W_i^*(s; \epsilon)| + |W_i^*(s; \epsilon) - W_i^*(t; \epsilon)| \\ &\leq L\epsilon + |W_i(s) - \mathcal{W}_i(s; \epsilon)| + L\epsilon \\ &\leq (2L + 1)\epsilon \end{aligned}$$

and so  $W_i^*$  converges uniformly to  $W_i$ . The same results hold for the anal-  
 ogously defined  $\tilde{W}_i^*$ . Then, note that, as  $\tilde{W}_i(t) \geq W_i(t)$ , it must be that  
 $\mathcal{W}_i(t; \epsilon) \geq \mathcal{W}_i(t; \epsilon)$ . Thus, it follows that  $\tilde{W}_i^*(t; \epsilon) \geq W_i^*(t; \epsilon)$ .

This means that Proposition 2 can be used. Define using stars the variables  
 that come from the  $\mathbf{U}^*$  and  $\tilde{\mathbf{U}}^*$  policies. Then, from Proposition 2, for each  
 $t \geq 0$ ,  $\epsilon > 0$  and  $i \in \{1, \dots, n\}$

$$I_i^*(t; \epsilon) + I_i^{V*}(t; \epsilon) + R_i^*(t; \epsilon) + R_i^{V*}(t; \epsilon) \geq \tilde{I}_i^*(t; \epsilon) + \tilde{I}_i^{V*}(t; \epsilon) + \tilde{R}_i^*(t; \epsilon) + \tilde{R}_i^{V*}(t; \epsilon)$$

and

$$R_i^*(t; \epsilon) \geq \tilde{R}_i^*(t; \epsilon).$$

Then, taking  $\epsilon \rightarrow 0$  and using Proposition 3 (noting that the perturbations to  
 the parameters, initial conditions and vaccination policies are all bounded by  
 a constant multiple of  $\epsilon$ ) shows that

$$I_i(t) + I_i^V(t) + R_i(t) + R_i^V(t) \geq \tilde{I}_i(t) + \tilde{I}_i^V(t) + \tilde{R}_i(t) + \tilde{R}_i^V(t)$$

and

$$R_i(t) \geq R_i^V(t).$$

311 Then, the result follows using the same logic as in the proof of Proposition 2.

## 312 5.5 Theorem 2

**Theorem 2.** *Suppose that  $B$  is differentiable, and that there is an optimal  
 solution  $\mathbf{U}$  to (6). Then, define the function*

$$\chi(t) := \begin{cases} A(t) & \text{if } \int_0^t \chi(s) ds < B(t) \\ \min(A(t), B'(t)) & \text{if } \int_0^t \chi(s) ds \geq B(t) \end{cases}$$

and suppose that  $\chi(t)$  exists and is bounded. Then, there exists an optimal solution  $\tilde{U}$  to the problem (6) such that

$$\sum_{i=1}^n \tilde{W}_i(t) = \max \left( \int_0^t \chi(s) ds, 1 \right).$$

Moreover, if  $\chi(t)$  is continuous almost everywhere, there exists an optimal solution  $\tilde{U}$  such that

$$\sum_{i=1}^n \tilde{U}_i(t) = \begin{cases} \chi(t) & \text{if } \int_0^t \chi(s) ds < 1 \\ 0 & \text{otherwise} \end{cases}$$

**Proof:** Suppose that  $U$  is an optimal vaccination policy. To begin, it will be shown that the total vaccination rate  $\chi$  is indeed a maximal-effort vaccination policy (in the sense that, at each time  $t^*$ , it is impossible to have given out more vaccines than a policy with total overall rate  $\chi(t)$ ).

**Claim:**  $\min \left( 1, \int_0^t \chi(s) ds \right) \geq \int_0^t \sum_{i=1}^n U_i(s) ds$  for all  $t > 0$

**Proof:** Consider any time  $t \geq 0$  such that

$$\int_0^t \chi(s) ds < 1$$

and define the set

$$\mathcal{T} := \left\{ s \leq t : \int_0^s \chi(k) dk \geq B(s) \right\}.$$

Suppose that  $\mathcal{T} = \emptyset$ . Then,

$$\chi(s) = A(s) \quad \forall s \leq t$$

and so

$$\int_0^t \chi(s) ds = \int_0^t A(s) ds \geq \int_0^t \sum_{i=1}^n U_i(s) ds.$$

Moreover, suppose that  $\mathcal{T} \neq \emptyset$  and define

$$\tau := \sup(\mathcal{T}).$$

Then,

$$\int_0^\tau \chi(s) ds \geq B(\tau) \geq \int_0^\tau \sum_{i=1}^n U_i(s) ds$$

and

$$\int_{\tau}^t \chi(s) ds = \int_{\tau}^t A(s) ds \geq \int_{\tau}^t \sum_{i=1}^n U_i(s) ds$$

so that

$$\int_0^t \chi(s) ds \geq \int_0^t \sum_{i=1}^n U_i(s) ds.$$

Thus, this holds in all cases for  $\int_0^t \chi(s) ds < 1$ . Finally, suppose that

$$\int_0^t \chi(s) ds \geq 1.$$

Then, one has

$$\min \left( 1, \int_0^{t^*} \chi(s) ds \right) = 1 = \sum_{i=1}^n N_i \geq \int_0^{t^*} \sum_{i=1}^n U_i(s) ds$$

and so the claim is proved.

It is now important to show that  $\chi$  gives a feasible vaccination rate. Note that  $\chi(t) \leq A(t)$  by definition.

**Claim:**  $\int_0^t \chi(s) ds \leq B(t)$  for all  $t \geq 0$ .

**Proof:** Suppose, for a contradiction, that there exists a  $t$  such that

$$\int_0^t \chi(s) ds > B(t).$$

Then, define

$$\sigma := \sup \left\{ s \leq t : \int_0^s \chi(s) ds \leq B(s) \right\}$$

which must exist (as  $\int_0^0 \chi(s) ds \leq B(0)$ ) and satisfy  $\sigma < t$ , by continuity of  $\int_0^t \chi(s) ds$  and  $B(t)$ . Note that

$$s \in (\sigma, t) \Rightarrow \chi(s) \leq B'(s)$$

and so

$$\int_0^t \chi(s) ds \leq \int_0^{\sigma} \chi(s) ds + \int_{\sigma}^t B'(s) ds \leq B(\sigma) + (B(t) - B(\sigma)) = B(t),$$

which is a contradiction. Thus,

$$\int_0^t \chi(s) ds \leq B(t) \quad \forall t \geq 0$$

as required.

Now, one can create a new optimal vaccination policy with total rate given by  $\chi$ . Define

$$q(t) = \begin{cases} \inf \left\{ s : \int_0^s \sum_{j=1}^n U_j(k) dk = \int_0^t \chi(k) dk \right\} & \text{if this exists} \\ \infty & \text{otherwise} \end{cases}$$

so that  $q(t)$  represents the earliest time at which  $\chi(t)$  vaccines were administered by the  $U$  policy. By continuity of the integral, this means that

$$\sum_{i=1}^n W_i(q(t)) = \int_0^{q(t)} \sum_{j=1}^n U_j(k) dk = \int_0^t \chi(s) ds.$$

Define further

$$Q := \sup\{t : q(t) < \infty\} \quad \text{and} \quad q_\infty := \lim_{t \rightarrow Q} (q(t))$$

so that  $Q$  is the earliest time at which all of the vaccines given out by the  $U$  policy could have been administered. Note that both  $Q$  and  $q_\infty$  may be infinite. By taking the limit  $t \rightarrow Q$ , and noting the left hand side is bounded by 1,

$$\int_0^{q_\infty} \sum_{j=1}^n U_j(k) dk = \int_0^Q \chi(k) dk$$

Then, the integral of the new vaccination policy,  $\tilde{W}$  is given by

$$\tilde{W}_i(t) = \begin{cases} W_i(q(t)) & \text{if } t < Q \\ W_i(q_\infty) + \frac{(N_i - W_i(q_\infty)) \int_Q^t \chi(s) ds}{1 - \sum_{i=1}^n W_i(q_\infty)} & \text{if } \int_0^t \chi(s) ds < 1 \quad \text{and} \quad t \geq Q \\ N_i & \text{if } \int_0^t \chi(s) ds \geq 1 \quad \text{and} \quad t \geq Q \end{cases}$$

This is well-defined as

$$\sum_{i=1}^n W_i(q_\infty) = 1 \Rightarrow \int_0^Q \chi(s) ds = 1$$

and so, in this case, the second part of the definition of  $\chi$  is never used. It is important to establish for feasibility that each  $W_i$  is bounded by  $N_i$ .

**Claim:**  $\tilde{W}_i(t) \leq N_i$  for all  $t \geq 0$  and all  $i \in \{1, \dots, n\}$ .

**Proof:** If  $t < Q$ , then  $W_i(q(t)) \leq N_i$  for all  $t < Q$  by feasibility of  $\mathbf{U}$ . Otherwise, if  $t \geq Q$  and  $\int_0^t \chi(s)ds < 1$ , then one has

$$\begin{aligned} W_i(q_\infty) + \frac{(N_i - W_i(q_\infty)) \int_0^t \chi(s)ds}{1 - \sum_{i=1}^n W_i(q_\infty)} &\leq W_i(q_\infty) + \frac{(N_i - W_i(q_\infty))(1 - \int_0^Q \chi(s)ds)}{1 - \sum_{i=1}^n W_i(q_\infty)} \\ &= W_i(q_\infty) + \frac{(N_i - W_i(q_\infty))(1 - \sum_{i=1}^n W_i(q_\infty))}{1 - \sum_{i=1}^n W_i(Q)} \\ &= N_i \end{aligned}$$

314 while if  $\int_0^t \chi(s)ds \geq 1$  then the result is immediate.

315

316 The optimisation problem is framed in terms of  $\mathbf{U}$  rather than  $\mathbf{W}$ , and so it  
317 is important to show that there is some  $\tilde{\mathbf{U}}$  that integrates to  $\tilde{\mathbf{W}}$ . One can do  
318 this by proving the Lipschitz continuity of  $\tilde{W}_i$  for each  $i$ .

**Claim:**  $\tilde{W}_i(t)$  is Lipschitz continuous for each  $i \in \{1, \dots, n\}$

**Proof:** Note that for  $s, t < Q$ , if  $M$  is a bound for  $\chi$  (which is assumed to exist)

$$\begin{aligned} |\tilde{W}_i(t) - \tilde{W}_i(s)| &= \left| \int_{q(s)}^{q(t)} U_i(k)dk \right| \\ &\leq \left| \int_{q(s)}^{q(t)} \sum_{j=1}^n U_j(k)dk \right| \\ &= \left| \int_s^t \chi(k)dk \right| \\ &\leq |t - s|M \end{aligned}$$

Moreover, if  $s, t > Q$  and  $\int_0^t \chi(k)dk, \int_0^s \chi(k)dk < 1$ , then

$$|\tilde{W}_i(t) - \tilde{W}_i(s)| \leq \left| \frac{(N_i - W_i(q_\infty)) \int_s^t \chi(s)ds}{1 - \sum_{i=1}^n W_i(q_\infty)} \right| \leq M \left| \frac{(N_i - W_i(q_\infty))}{1 - \sum_{i=1}^n W_i(q_\infty)} \right| |t - s|$$

and if  $s, t > Q$  and  $\int_0^t \chi(k)dk, \int_0^s \chi(k)dk \geq 1$ , then  $\tilde{W}_i(t) = \tilde{W}_i(s)$ . The intermediate cases (where  $s$  and  $t$  correspond to different cases in the definition of  $\chi$ ) can be proved by combining these bounds.

This means that (for each  $i$ ) there exists a Lebesgue integrable function  $\tilde{U}_i(t)$  such that

$$\frac{d\tilde{W}_i}{dt} = \tilde{U}_i(t) \quad \text{almost everywhere}$$



and, for all  $t \geq 0$

$$\int_0^t \tilde{U}_i(s) ds = \tilde{W}_i(t)$$

319 A proof of this (for the broader class of absolutely continuous functions) can be  
 320 found in [Bárceñas \(2000\)](#). One can set  $\tilde{U}_i(t)$  to be zero for any  $t$  such that  $\tilde{W}_i(t)$   
 321 is not differentiable. Thus, noting that, where it is differentiable, the derivative  
 322 of  $\tilde{W}_i$  is bounded by its Lipschitz constant,  $\tilde{U}_i(t)$  is bounded as required.

Note that, in all cases (as  $\sum_{i=1}^n N_i = 1$ )

$$\sum_{i=1}^n \tilde{W}_i(t) = \min \left( \int_0^t \chi(s) ds, 1 \right)$$

and so  $\tilde{\mathbf{W}}$  does correspond to a maximal vaccination rate. If  $\chi(t)$  is continuous almost everywhere, then one can differentiate this relationship at  $t$  where each  $\tilde{W}_i$  is differentiable and  $\chi$  is continuous to show that  $\sum_{i=1}^n U_i(t) = \chi(t)$ . The complement of this set must have zero measure (as it is the finite union of zero measure sets), and so, in this case, one can change the values of each  $U_i(t)$  so that  $\sum_{i=1}^n U_i(t) = \chi(t)$  everywhere without changing the value of  $\mathbf{W}$ .

**Claim:**  $\tilde{W}_i(t) \geq W_i(t)$  for all  $i \in \{1, \dots, n\}$  and  $t \geq 0$

**Proof:** Note that, by maximality of  $\chi$ , for  $t < Q$ ,

$$\sum_{j=1}^n \tilde{W}_j(t) = \sum_{j=1}^n W_j(q(t)) = \int_0^t \chi(s) ds \geq \sum_{j=1}^n W_j(t)$$

If  $q(t) \geq t$ , then  $W_i(q(t)) \geq W_i(t)$  for each  $i$ . If  $q(t) < t$ , then it is necessary that  $W_i(q(t)) = W_i(t)$  for each  $i$  as  $W_i$  is non-decreasing. Thus,  $W_i(q(t)) \geq W_i(t)$  for all  $i$  and for all  $t < Q$ .

If  $t > Q$  and  $\int_0^t \chi(s) ds < 1$ , then

$$\tilde{W}_i(t) \geq W_i(q_\infty) \tag{23}$$

Now, by definition of  $Q$ , it is necessary that

$$\int_0^t \chi(k) dk \geq \int_0^\infty \sum_{j=1}^n U_j(k) dk \quad \forall t > Q$$

as otherwise, there must exist some  $t > Q$  and some  $s < \infty$  such that

$$\int_0^t \chi(k) dk = \int_0^s \sum_{j=1}^n U_j(k) dk$$

which means that  $q(t) < \infty$ . Thus, by continuity, for all  $\tau \in (0, t)$ , there exists some  $s$  such that

$$\int_0^\tau \chi(k) dk = \int_0^s \sum_{j=1}^n U_j(k) dk$$

which means  $Q \geq t$ , which is a contradiction.

Thus, by taking  $t \rightarrow Q$ ,

$$\int_0^{q_\infty} \sum_{i=1}^n U_i(k) dk = \int_0^Q \chi(k) dk \geq \int_0^\infty \sum_{j=1}^n U_j(k) dk$$

and so

$$\int_{q_\infty}^\infty U_j(k) dk = 0 \Rightarrow W_i(t) = W_i(q_\infty) \quad \forall i \in \{1, \dots, n\} \quad \text{and} \quad \forall t \geq q_\infty$$

Thus, using (23),

$$\tilde{W}_i(t) \geq W_i(t).$$

Finally, if  $t > Q$  and  $\int_0^t \chi(s) ds \geq 1$ , then  $\tilde{W}_i(t) = N_i \geq W_i(t)$ . Thus, for all  $t$  and  $i$ ,

$$\tilde{W}_i(t) \geq W_i(t)$$

as required.

Thus, by Theorem 1, it is necessary that

$$H(\mathbf{U}) \geq H(\tilde{\mathbf{U}})$$

and hence, by the optimality of  $\mathbf{U}$ ,  $\tilde{\mathbf{U}}$  is optimal as required.

### 5.6 Theorem 3

**Theorem 3.** *Under the assumptions of Theorem 2, consider a modified objective function  $\mathcal{H}$  given by*

$$\mathcal{H}(\mathbf{U}) = H(\mathbf{U}) + F(\mathbf{W}(\infty))$$

for any function  $F$ . Then, with  $\chi$  defined to be the maximal vaccination effort as in Theorem 2, there exists an optimal solution  $\tilde{\mathbf{U}}$  such that, for some  $\tau \geq 0$

$$\sum_{i=1}^n \tilde{W}_i(t) = \begin{cases} \int_0^t \chi(s) ds & \text{if } t \leq \tau \\ W_i(\tau) & \text{otherwise} \end{cases}.$$

Moreover, if  $\chi$  is continuous almost everywhere, then there is an optimal solution  $\tilde{U}$  such that

$$\sum_{i=1}^n U_i(t) = \begin{cases} \chi(t) & \text{if } t \leq \tau \\ 0 & \text{otherwise} \end{cases}.$$

**Proof:** This follows directly from the proof of Theorem 2. One can again define  $\tilde{U}$  in the interval  $(0, Q)$  (where  $Q$  is defined in the proof of Theorem 2) such that

$$H(U) \geq H(\tilde{U}) \quad \text{and} \quad \int_0^t \sum_{i=1}^n \tilde{U}_i(s) ds = \int_0^t \chi(s) ds \quad \forall t < Q$$

with the only difference being that now

$$\tilde{U}_i(t) = 0 \quad \forall t \geq Q.$$

Thus, as shown in the proof of Theorem 2,

$$W(\infty) = W(q_\infty) = \tilde{W}(Q) = \tilde{W}(\infty)$$

and so

$$\mathcal{H}(U) \geq \mathcal{H}(\tilde{U}),$$

325 which means  $\tilde{U}$  is optimal as required.

## 326 6 Limitations of Theorem 1

327 It is helpful to consider the limitations of Theorem 1, as it does not prove  
328 that every conceivable cost function is non-increasing in vaccination effort.  
329 This will be illustrated through some examples based on theoretical COVID-19  
330 outbreaks in the United Kingdom.

331 Using the work of Prem et al (2017), one can split the UK into 16 age-  
332 groups (comprising five year intervals from 0 to 75 and a group for those aged  
333 75+) which mix heterogeneously. The contact matrices estimated in Prem et al  
334 (2017) allow for the construction of a matrix  $\beta^*$ , which will be proportional  
335 to each of the matrices  $\beta^\alpha$  in the model.

As illustrated in Liu et al (2020), estimation of the basic reproduction number  $R_0$  for COVID-19 is complicated, and a wide range of estimates have been produced. For the examples in this paper, a reproduction number of 4 will be used, meaning that  $\beta^1$  will be scaled so that the largest eigenvalue of the matrix given by

$$M_{ij} = \frac{\beta_{ij}^1 N_i}{\mu_i^1}$$

336 is equal to 4. Note that the population of each group  $N$  - normalised to have  
337 total sum 1 - is taken from uni (2019). Moreover, based on the estimates in

338 [Ram and Schaposnik \(2021\)](#), the value of  $\mu_i^1$  and, in the first example,  $\mu_i^2$  will  
339 be set equal to  $\frac{1}{14}$ .

340 To model the effectiveness of vaccination, the estimates of [Dean and](#)  
341 [Halloran \(2022\)](#) will be used so that  $\beta^2 = 0.77\beta^1$ , (modelling the reduction  
342 in infectiousness),  $\beta^3 = 0.3\beta^1$  (modelling the reduction in susceptibility) and  
343  $\beta^4 = 0.77 \times 0.3 \times \beta^1$  (assuming these effects are independent). Finally, the  
344 initial conditions used are  $S_i(0) = (1 - 10^{-4})N_i$  and  $I_i(0) = (10^{-4})N_i$  for  
345 each  $i$ , modelling a case where 0.01% of the population is initially infected.  
346 It should be emphasised however, that this model has purely been made for  
347 illustrative purposes and substantially more detailed fitting analysis would be  
348 required to use it for forecasting COVID-19 in the UK.

349  
350 In both the subsequent examples, it will be assumed that 0.5% of the popula-  
351 tion is vaccinated homogeneously each day in the vaccination case. This will  
352 be compared to a case with no vaccination.

## 353 **6.1 Infections Are Not Decreasing For All Time**

354 While the overall number of infections will decrease as vaccination effort  
355 increases, the infections at a particular point in time will not. [Figure 2](#) shows  
356 that the effect of vaccination is both to reduce, but also delay the peak of  
357 the infections. This is an important consideration when deciding vaccination  
358 policy, as increasing infections at a time in the year when hospitals are under  
359 more pressure could have negative consequences, and so it is important not to  
360 simply assume that vaccination will reduce all infections at all times.

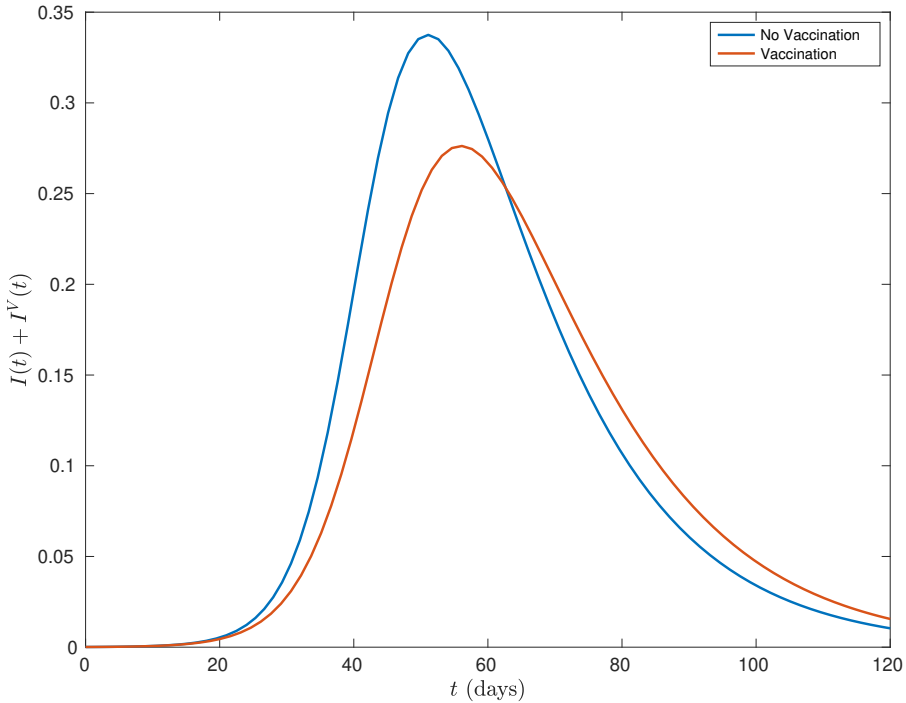

**Fig. 2** A comparison of the total infections over time for a simulated COVID-19 epidemic in the UK, depending on whether a uniform vaccination strategy of constant rate is used.

## 6.2 Deaths Are Not Decreasing For All Time

Perhaps most surprisingly, the total deaths in the epidemic may at some finite times (although not at  $t = \infty$ ) be higher when vaccination occurs, at least under the assumptions of the SIR model. This is a rarer phenomenon, but is possible if vaccination increases the recovery rate as well as decreasing infectiousness.

For illustrative purposes, suppose that vaccination doubles the recovery rate (so that  $\mu_i^2 = \frac{1}{7}$ ) and has no effect on mortality rates. Then, using Bonanad et al (2020) to get age-dependent mortality rates for COVID-19, Figure 3 shows that initially, the number of deaths is higher in the case of vaccination. This occurs because the higher value of  $\mu^2$  means that vaccinated people move more quickly to the  $R^V$  compartment than their unvaccinated counterparts and so, while they will infect fewer people, when the number of infections is comparable in the early epidemic, this means that more people will die. Of course, this is not a realistic reflection of the course of an epidemic - the reason for  $\mu^2$  being higher is that vaccinated people are likely to get *less* ill rather than dying more quickly - but it illustrates that the model equations can have interesting, and unexpected properties.

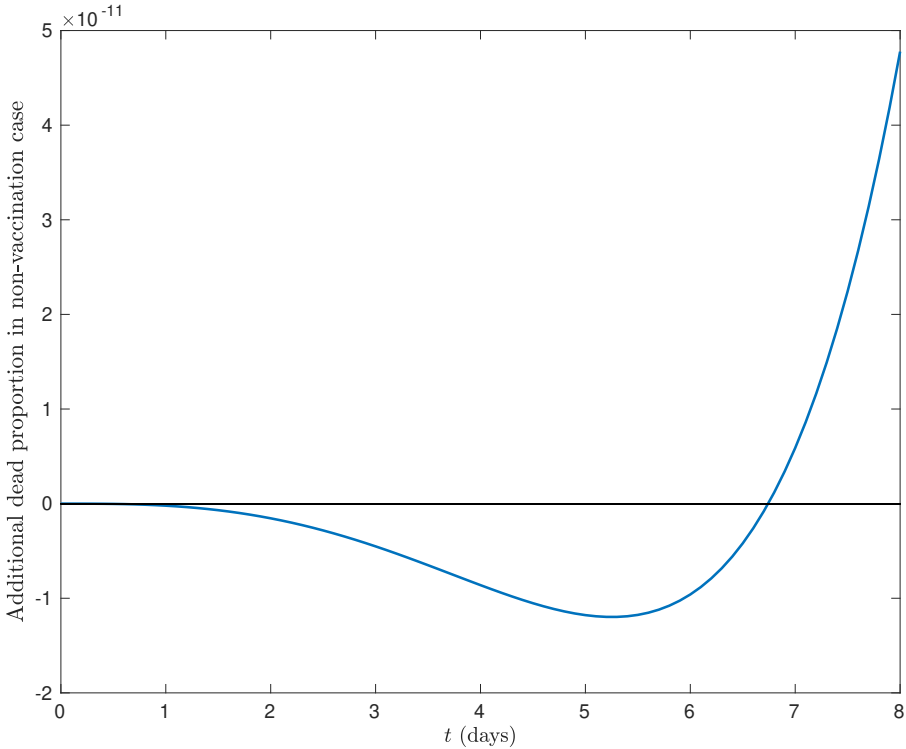

**Fig. 3** The difference between proportion of the population that has died by each time  $t$  in the case of vaccination and non-vaccination. Positive values indicate that the deaths are higher in the non-vaccination case.

## 7 Discussion

379

380 It is comforting that the multi-group SIR model does indeed satisfy the con-  
381 dition that the final numbers of infections and deaths are non-increasing in  
382 vaccination effort. This shows the importance of ensuring that vaccinations  
383 are available as early as possible in a disease outbreak. To achieve this, it is  
384 important that good plans for vaccine roll-out and supply chains are available  
385 in advance of them being needed to ensure that maximum benefit from the  
386 vaccination program is obtained.

387 However, there are limitations to these results. Indeed, while the final num-  
388 bers of infections and deaths are guaranteed to decrease, this is not necessarily  
389 true at a given finite time. In particular, vaccination can move the peak of  
390 the epidemic, and so it is important to consider the consequences of this,  
391 particularly if only a small number of lives are saved by vaccination.

392 Moreover, while this has not been discussed in this paper, it is also impor-  
393 tant to emphasise that these results only apply if vaccine efficacy does not  
394 decay over time. Indeed, if vaccination efficacy does decay significantly, then  
395 vaccinating the most vulnerable groups in a population very early may be

396 worse than vaccinating them later, unless booster jabs are available. If the  
397 main epidemic occurs long after the vulnerable have been vaccinated, their  
398 immunity may have worn off significantly by the time that the majority of  
399 disease exposure occurs. Thus, in this case a more detailed analysis would be  
400 needed to determine the optimal vaccination rate.

401 It seems to the authors that future models for optimal vaccination should  
402 use the unvaccinated-only model used in in this paper, where vaccines are  
403 distributed randomly to the unvaccinated, rather than the entire population.  
404 While for small total vaccination numbers, the difference between the two mod-  
405 els is small, when a significant proportion of the population is vaccinated, there  
406 can be large differences between the optimal policies, as was shown through  
407 the example in Section 2. Moreover, it appears to better reflect the vaccine  
408 uptake from the COVID-19 pandemic, as was illustrated in Figure 1.

409 Of course, this modified model is slightly more complicated, and care needs  
410 to be taken to avoid numerical instabilities arising from the removable singular-  
411 ity in the  $\frac{U_i S_i}{N_i - W_i}$  term when  $W_i \rightarrow N_i$ . However, it has been shown that many  
412 of the standard properties of SIR models, and indeed the results of this paper,  
413 still hold for this model, and so these extra technical difficulties appear to be  
414 a small price to pay for the significantly increased accuracy and potentially  
415 large difference between the optimal solutions for the two models.

416 The results of this paper could be extended to cover a wider range of disease  
417 models that are currently being used in the literature. In particular, the next  
418 step could be to prove the results for SEIR (Susceptible-Exposed-Infected-  
419 Recovered) models, and indeed models with multiple exposed compartments  
420 for each subgroup. This would help to build a general mathematical theory of  
421 maximal-effort vaccination that would provide evidence for the reliability of  
422 contemporary epidemiological modelling.

## 423 8 Conclusion

424 The results of this paper are summarised below:

- 425 • Vaccinating at maximal effort is optimal for a multi-group SIR model with  
426 non-decaying vaccination efficacy.
- 427 • The “random vaccination model” found in the literature may overestimate  
428 the decay of vaccination uptake in a population and so the “unvaccinated-  
429 only model” presented here should be considered for finding optimal  
430 vaccination policies.
- 431 • While vaccinating at maximal effort gives optimality, there can be finite  
432 times at which, according to the SIR model, infections or deaths are higher  
433 if vaccination has occurred.

## 434 Declarations

435 This work was funded by a DTP Studentship awarded to Matthew Penn  
436 by the Engineering and Physical Sciences Research Council (EPSRC)

437 through the University of Oxford ([https://www.ukri.org/councils/epsrc/  
438 career-and-skills-development/studentships/doctoral-training-partnerships/](https://www.ukri.org/councils/epsrc/career-and-skills-development/studentships/doctoral-training-partnerships/)).  
439 For the purpose of Open Access, the author has applied a CC BY public copy-  
440 right licence to any Author Accepted Manuscript (AAM) version arising from  
441 this submission. The funders played no specific role in any aspect of this work.

442 The authors declare no competing interests.

## 443 **Data Availability**

444 As cited in the text, the data used to create Figure 1 is avail-  
445 able from [https://github.com/owid/covid-19-data/blob/master/public/data/  
446 vaccinations/vaccinations-by-age-group.csv](https://github.com/owid/covid-19-data/blob/master/public/data/vaccinations/vaccinations-by-age-group.csv). The data used to create Figure  
447 2 is available from [https://journals.plos.org/ploscompbiol/article?id=10.  
448 1371/journal.pcbi.1005697](https://journals.plos.org/ploscompbiol/article?id=10.1371/journal.pcbi.1005697) and [https://population.un.org/wpp/Download/  
449 Standard/Population/](https://population.un.org/wpp/Download/Standard/Population/). The additional data used to create Figure 3 is available  
450 from <https://www.sciencedirect.com/science/article/pii/S1525861020304412>.

## 451 **Acknowledgements**

452 The authors would like to thank Cameron Simmons, Joseph Penn and Grace  
453 Penn for their invaluable proof-reading work.

## 454 **References**

- 455 (2019) World population prospects - population division. URL [https://  
456 population.un.org/wpp/Download/Standard/Population/](https://population.un.org/wpp/Download/Standard/Population/)
- 457 Abakuks A (1972) Some optimal isolation and immunisation policies for  
458 epidemics. PhD thesis, University of Sussex
- 459 Acemoglu D, Chernozhukov V, Werning I, et al (2021) Optimal targeted lock-  
460 downs in a multigroup sir model. *American Economic Review: Insights*  
461 3(4):487–502
- 462 Aubrey L, Ishak A, Dutta S, et al (2022) Covid-19 vaccine wastage in canada,  
463 a reason for concern? *Canadian Journal of Public Health* pp 1–2
- 464 Ball FG, Lyne OD (2002) Optimal vaccination policies for stochastic epidemics  
465 among a population of households. *Mathematical Biosciences* 177:333–354
- 466 Bárcenas D (2000) The fundamental theorem of calculus for lebesgue integral.  
467 *Divulgaciones Matemáticas* 8(1):75–85
- 468 Becker NG, Starczak DN (1997) Optimal vaccination strategies for a commu-  
469 nity of households. *Mathematical Biosciences* 139(2):117–132



- 470 Bonanad C, García-Blas S, Tarazona-Santabalbina F, et al (2020) The effect  
471 of age on mortality in patients with covid-19: a meta-analysis with 611,583  
472 subjects. *Journal of the American Medical Directors Association* 21(7):915–  
473 918
- 474 Boutayeb H, Bidah S, Zakary O, et al (2021) Automated optimal vaccina-  
475 tion and travel-restriction controls with a discrete multi-region sir epidemic  
476 model. *Commun Math Biol Neurosci*
- 477 Castro MC, Singer B (2021) Prioritizing covid-19 vaccination by age. *Proceed-*  
478 *ings of the National Academy of Sciences* 118(15)
- 479 Chandra J, Davis PW (1976) Linear generalizations of Gronwall’s inequality.  
480 *Proceedings of the American mathematical society* 60(1):157–160
- 481 Chen L, Sun J (2014) Optimal vaccination and treatment of an epidemic  
482 network model. *Physics Letters A* 378(41):3028–3036
- 483 Collins PJ (2006) *Differential and integral equations*. OUP Oxford
- 484 Dean NE, Halloran ME (2022) Protecting the herd with vaccination. *Science*  
485 375(6585):1088–1089
- 486 Duijzer LE, van Jaarsveld WL, Wallinga J, et al (2018) Dose-optimal  
487 vaccine allocation over multiple populations. *Production and Operations*  
488 *Management* 27(1):143–159
- 489 Estadilla CDS, Uyheng J, de Lara-Tuprio EP, et al (2021) Impact of vaccine  
490 supplies and delays on optimal control of the covid-19 pandemic: mapping  
491 interventions for the philippines. *Infectious Diseases of Poverty* 10(04):46–59
- 492 Fitzpatrick MC, Galvani AP (2021) Optimizing age-specific vaccination.  
493 *Science* 371(6532):890–891
- 494 Fu Y, Jin H, Xiang H, et al (2022) Optimal lockdown policy for vaccination  
495 during covid-19 pandemic. *Finance research letters* 45:102,123
- 496 Hansen E, Day T (2011) Optimal control of epidemics with limited resources.  
497 *Journal of mathematical biology* 62(3):423–451
- 498 Hill AN, Longini Jr IM (2003) The critical vaccination fraction for heteroge-  
499 neous epidemic models. *Mathematical biosciences* 181(1):85–106
- 500 Kar TK, Batabyal A (2011) Stability analysis and optimal control of an sir  
501 epidemic model with vaccination. *Biosystems* 104(2-3):127–135
- 502 Kuga K, Tanimoto J (2018) Impact of imperfect vaccination and defense  
503 against contagion on vaccination behavior in complex networks. *Journal of*

- 504 Statistical Mechanics: Theory and Experiment 2018(11):113,402
- 505 Kuniya T (2019) Global behavior of a multi-group sir epidemic model with  
506 age structure and an application to the chlamydia epidemic in japan. SIAM  
507 Journal on Applied Mathematics 79(1):321–340
- 508 Lee S, Golinski M, Chowell G (2012) Modeling optimal age-specific vaccina-  
509 tion strategies against pandemic influenza. Bulletin of mathematical biology  
510 74(4):958–980
- 511 Liu Y, Gayle AA, Wilder-Smith A, et al (2020) The reproductive number of  
512 covid-19 is higher compared to sars coronavirus. Journal of travel medicine
- 513 Mathieu E, Ritchie H, Ortiz-Ospina E, et al (2021) A global database of covid-  
514 19 vaccinations. Nature human behaviour 5(7):947–953
- 515 Moore S, Hill EM, Dyson L, et al (2021) Modelling optimal vaccination strat-  
516 egy for sars-cov-2 in the uk. PLoS computational biology 17(5):e1008,849
- 517 Morton R, Wickwire KH (1974) On the optimal control of a deterministic  
518 epidemic. Advances in Applied Probability 6(4):622–635
- 519 Prem K, Cook AR, Jit M (2017) Projecting social contact matrices in 152  
520 countries using contact surveys and demographic data. PLoS computational  
521 biology 13(9):e1005,697
- 522 Ram V, Schaposnik LP (2021) A modified age-structured sir model for covid-19  
523 type viruses. Scientific Reports 11(1):1–15
- 524 Ritchie H, Mathieu E, Rodés-Guirao L, et al (2020) Coronavirus pandemic  
525 (covid-19). Our world in data
- 526 Schwarz B (1970) Totally positive differential systems. Pacific Journal of  
527 Mathematics 32(1):203–229
- 528 Zaman G, Kang YH, Jung IH (2008) Stability analysis and optimal vaccination  
529 of an sir epidemic model. BioSystems 93(3):240–249
- 530 Zavrakli E, Parnell A, Malone D, et al (2021) Optimal age-specific vaccination  
531 control for covid-19. arXiv preprint arXiv:210415088
- 532 Zhang H, Yang Z, Pawelek KA, et al (2020) Optimal control strategies for  
533 a two-group epidemic model with vaccination-resource constraints. Applied  
534 Mathematics and Computation 371:124,956
- 535 Zhou Y, Yang K, Zhou K, et al (2014) Optimal vaccination policies for an sir  
536 model with limited resources. Acta biotheoretica 62(2):171–181

## 537 A Supplementary Lemmas For Proposition 1 538 and 2 and Theorem 2

For the proofs of these lemmas, it is helpful to recall the following definitions of the following variables, which will be extensively used.

$$K_{ij}(t) = \frac{\beta_{ij}^1}{\mu_j^1} R_j + \frac{\beta_{ij}^2}{\mu_j^2} R_j^V,$$

$$L_{ij}(t) := \frac{\beta_{ij}^3}{\mu_i^1} R_j + \frac{\beta_{ij}^4}{\mu_i^2} R_j^V$$

and

$$\Pi := \{i : \exists t \geq 0 \text{ s.t. } I_i(t) > 0 \text{ or } I_i^V(t) > 0\}.$$

539 Moreover, note that, under the assumptions of Proposition 1 and 2, each  $U_i(t)$   
540 is a step function and is therefore piecewise smooth in each bounded interval.  
541 Thus, in particular, the derivatives of each of the model variables (and indeed,  
542 the derivative of  $W_i(t)$ ) are piecewise continuous in each bounded interval,  
543 meaning that each of the model variables is piecewise continuously differenti-  
544 able in each bounded interval. This means that integration by parts can be  
545 performed (in a bounded interval), as will be done extensively throughout the  
546 proofs of these lemmas.

### 547 A.1 Lemma A.1

**Lemma A.1.** *Suppose that  $f(t)$  is a non-increasing, non-negative, continuous and piecewise continuously differentiable function and that the continuous and piecewise continuously differentiable functions  $g(t)$  and  $h(t)$  satisfy  $g(0) = h(0)$  and  $g(t) \leq h(t)$  for all  $t \geq 0$ . Then,*

$$\int_0^t g'(s)f(s)ds \leq \int_0^t h'(s)f(s)ds.$$

**Proof:** This follows from integrating by parts:

$$\begin{aligned} \int_0^t g'(s)f(s)ds &= g(t)f(t) - g(0)f(0) - \int_0^t g(s)f'(s)ds \\ &= g(t)f(t) - h(0)f(0) + \int_0^t g(s)|f'(s)|ds \\ &\leq h(t)f(t) - h(0)f(0) + \int_0^t h(s)|f'(s)|ds \\ &\leq h(t)f(t) - h(0)f(0) - \int_0^t h(s)f'(s)ds \\ &= \int_0^t h'(s)f(s)ds \end{aligned}$$

548 as required.

## 549 **A.2 Lemma A.2**

**Lemma A.2.** *Suppose that*

$$\sum_{j=1}^n K_{ij}(t) \geq \sum_{j=1}^n \tilde{K}_{ij}(t) \quad \text{and} \quad \sum_{j=1}^n L_{ij}(t) \geq \sum_{j=1}^n \tilde{L}_{ij}(t) \quad \forall i \in \{1, \dots, n\} \quad \text{and} \quad t \in [0, T].$$

Then,

$$S_i(t) + S_i^V(t) \leq \tilde{S}_i(t) + \tilde{S}_i^V(t) \quad \forall t \in [0, T].$$

**Proof:** To reduce notation in this proof, define

$$\mathcal{K}(t) := \sum_{j=1}^n K_{ij}(t) \quad \text{and} \quad \mathcal{L}(t) := \sum_{j=1}^n L_{ij}(t)$$

Note that

$$\begin{aligned} \frac{d}{dt}(S_i + S_i^V) &= - \sum_{j=1}^n \left( \beta_{ij}^1 I_j + \beta_{ij}^2 I_j^V \right) S_i - \sum_{j=1}^n \left( \beta_{ij}^3 I_j + \beta_{ij}^4 I_j^V \right) S_i^V \\ &= - \sum_{j=1}^n \left( \beta_{ij}^3 I_j + \beta_{ij}^4 I_j^V \right) (S_i + S_i^V) \dots \\ &\quad - \sum_{j=1}^n \left( (\beta_{ij}^1 - \beta_{ij}^3) I_j + (\beta_{ij}^2 - \beta_{ij}^4) I_j^V \right) S_i. \end{aligned}$$

Thus,

$$\begin{aligned} - \sum_{j=1}^n \left( (\beta_{ij}^1 - \beta_{ij}^3) I_j + (\beta_{ij}^2 - \beta_{ij}^4) I_j^V \right) S_i &= \frac{d}{dt} (S_i + S_i^V) \dots \\ &\quad + \sum_{j=1}^n \left( \beta_{ij}^3 I_j + \beta_{ij}^4 I_j^V \right) (S_i + S_i^V) \\ &= \frac{d}{dt} \left( (S_i + S_i^V) e^{\mathcal{L}(t)} \right) e^{-\mathcal{L}(t)}. \end{aligned}$$

This means that

$$S_i(t) + S_i^V(t) = e^{-\mathcal{L}(t)} \left[ S_i(0) - \int_0^t e^{\mathcal{L}(s)} \sum_{j=1}^n \left( (\beta_{ij}^1 - \beta_{ij}^3) I_j + (\beta_{ij}^2 - \beta_{ij}^4) I_j^V \right) S_i ds \right]$$

$$= S_i(0) \left[ e^{-\mathcal{L}(t)} - \int_0^t e^{\mathcal{L}(s)-\mathcal{K}(s)-\mathcal{L}(t)} (\mathcal{K}'(s) - \mathcal{L}'(s)) \left( \frac{N_i - W_i(s)}{N_i} \right) \right] ds.$$

Now, one can see that, as  $0 \leq W_i(s) \leq N_i$ ,

$$0 \leq \frac{N_i - W_i(s)}{N_i} \leq 1 \quad \forall s \geq 0$$

and hence

$$e^{-\mathcal{L}(t)} = 1 - \int_0^t \mathcal{L}'(s) e^{-\mathcal{L}(s)} ds \leq 1 - \int_0^t \mathcal{L}'(s) e^{-\mathcal{L}(s)} \left( \frac{N_i - W_i(s)}{N_i} \right) ds.$$

Now, this means that

$$\begin{aligned} S_i(t) + S_i^V(t) &\leq \\ S_i(0) - S_i(0) &\int_0^t \left[ \mathcal{L}'(s) e^{-\mathcal{L}(s)} + e^{\mathcal{L}(s)-\mathcal{K}(s)-\mathcal{L}(t)} \sum_{j=1}^n \left( \mathcal{K}'(s) - \mathcal{L}'(s) \right) \right] \left( \frac{N_i - W_i(s)}{N_i} \right) ds. \end{aligned}$$

This allows the use of Lemma A.1. Firstly, note that, as  $\mathcal{K}'(s) \geq \mathcal{L}'(s) \geq 0$  and  $\tilde{W}_i(s) \geq W_i(s)$ , one has

$$\begin{aligned} S_i(t) + S_i^V(t) &\leq \\ S_i(0) - S_i(0) &\int_0^t \left[ \mathcal{L}'(s) e^{-\mathcal{L}(s)} + e^{\mathcal{L}(s)-\mathcal{K}(s)-\mathcal{L}(t)} \sum_{j=1}^n \left( \mathcal{K}'(s) - \mathcal{L}'(s) \right) \right] \left( \frac{N_i - \tilde{W}_i(s)}{N_i} \right) ds. \end{aligned}$$

Moreover,

$$\begin{aligned} &\int_0^t \left[ \mathcal{L}'(s) e^{-\mathcal{L}(s)} + e^{\mathcal{L}(s)-\mathcal{K}(s)-\mathcal{L}(t)} \sum_{j=1}^n \left( \mathcal{K}'(s) - \mathcal{L}'(s) \right) \right] ds \\ &= 1 - e^{-\mathcal{L}(t)} + e^{-\mathcal{L}(t)} - e^{-\mathcal{K}(t)} \\ &= 1 - e^{-\mathcal{K}(t)} \\ &\geq 1 - e^{-\tilde{\mathcal{K}}(t)} \\ &\geq \int_0^t \left[ \tilde{\mathcal{L}}'(s) e^{-\tilde{\mathcal{L}}(s)} + e^{\tilde{\mathcal{L}}(s)-\tilde{\mathcal{K}}(s)-\tilde{\mathcal{L}}(t)} \sum_{j=1}^n \left( \tilde{\mathcal{K}}'(s) - \tilde{\mathcal{L}}'(s) \right) \right] ds \end{aligned}$$

and  $N_i - W_i(s)$  is non-increasing in  $s$ . Thus, by Lemma A.1, with

$$g(s) = 1 - e^{-\mathcal{L}(s)} + e^{-\mathcal{L}(t)} - e^{\mathcal{L}(s)-\mathcal{K}(s)-\mathcal{L}(t)},$$

$h(s)$  defined as the tilde version of  $g(s)$ , and  $f(s) := N_i - W_i(s)$ , one has

$$\begin{aligned} & \int_0^t \left[ \mathcal{L}'(s)e^{-\mathcal{L}(s)} + e^{\mathcal{L}(s)-\mathcal{K}(s)-\mathcal{L}(t)} \sum_{j=1}^n \left( \mathcal{K}'(s) - \mathcal{L}'(s) \right) \right] \left( \frac{N_i - \tilde{W}_i(s)}{N_i} \right) ds \\ & \geq \int_0^t \left[ \tilde{\mathcal{L}}'(s)e^{-\tilde{\mathcal{L}}(s)} + e^{\tilde{\mathcal{L}}(s)-\tilde{\mathcal{K}}(s)-\tilde{\mathcal{L}}(t)} \sum_{j=1}^n \left( \tilde{\mathcal{K}}'(s) - \tilde{\mathcal{L}}'(s) \right) \right] \left( \frac{N_i - \tilde{W}_i(s)}{N_i} \right) ds. \end{aligned} \tag{24}$$

Thus, (as this integral is multiplied by -1 in (24)), combining this with (24) gives

$$S_i(t) + S_i^V(t) \leq \tilde{S}_i(t) + \tilde{S}_i^V(t) \quad \forall t \in [0, T]$$

as required

### A.3 Lemma A.3

**Lemma A.3.** *Suppose that*

$$\sum_{j=1}^n K_{ij}(t) \geq \sum_{j=1}^n \tilde{K}_{ij}(t) \quad \forall i \in \{1, \dots, n\} \quad \text{and} \quad t \in [0, T].$$

Then

$$I_i(t) + R_i(t) \geq \tilde{I}_i(t) + \tilde{R}_i(t) \quad \forall t \in [0, T].$$

To begin, one can write the equation for  $S_i$  as

$$\frac{1}{S_i} \frac{dS_i}{dt} = - \sum_{j=1}^n (K'_{ij}(t)) - \frac{U_i}{N_i - W_i}$$

and hence, integrating

$$\ln(S_i(t)) - \ln(S_i(0)) = - \sum_{j=1}^n K_{ij}(t) + \ln(N_i - W_i(t)) - \ln(N_i)$$

which implies

$$S_i(t) = \left( \frac{S_i(0)(N_i - W_i(t))}{N_i} \right) e^{-\sum_{j=1}^n K_{ij}(t)}$$

Using this result shows that

$$\frac{d}{dt}(I_i + R_i) = \sum_{j=1}^n \left( \beta_{ij}^1 I_j + \beta_{ij}^2 I_j^Y \right) S_i$$

$$\begin{aligned}
 &= \sum_{j=1}^n K'_{ij}(t) S_i \\
 &= \left[ \sum_{j=1}^n K'_{ij}(t) \right] \left( \frac{S_i(0)(N_i - W_i(t))}{N_i} \right) e^{-\sum_{j=1}^n K_{ij}(t)},
 \end{aligned}$$

Thus,

$$\begin{aligned}
 I_i(t) + R_i(t) &= I_i(0) + \int_0^t \left[ \sum_{j=1}^n K'_{ij}(s) \right] \left( \frac{S_i(0)(N_i - W_i(s))}{N_i} \right) e^{-\sum_{j=1}^n K_{ij}(s)} ds \\
 &\geq \tilde{I}_i(0) + \int_0^t \left[ \sum_{j=1}^n K'_{ij}(s) \right] \left( \frac{S_i(0)(N_i - \tilde{W}_i(s))}{N_i} \right) e^{-\sum_{j=1}^n K_{ij}(s)} ds,
 \end{aligned} \tag{25}$$

using the fact that the initial conditions are the same in both cases and that  $W_i \leq \tilde{W}_i$ . Now, one can use the results of Lemma A.1 with

$$g(t) = 1 - \exp\left(-\sum_{j=1}^n K_{ij}(t)\right), \quad h(t) = 1 - \exp\left(-\sum_{j=1}^n \tilde{K}_{ij}(t)\right)$$

and  $f(t) = (N_i - \tilde{W}_i(t))$ , noting that

$$\begin{aligned}
 \int_0^t \left[ \sum_{j=1}^n K'_{ij}(s) \right] e^{-\sum_{j=1}^n K_{ij}(s)} ds &= 1 - e^{-\sum_{j=1}^n K_{ij}(t)} \\
 &\geq 1 - e^{-\sum_{j=1}^n \tilde{K}_{ij}(t)} \\
 &= \int_0^t \left[ \sum_{j=1}^n \tilde{K}'_{ij}(s) \right] e^{-\sum_{j=1}^n \tilde{K}_{ij}(s)} ds
 \end{aligned}$$

and that  $N_i - \tilde{W}_i(t)$  is non-increasing. Thus,

$$I_i(t) + R_i(t) \geq \tilde{I}_i(t) + \tilde{R}_i(t) \quad \forall t \in [0, T]$$

552 as required.

#### 553 A.4 Lemma A.4

**Lemma A.4.** *Suppose that*

$$\sum_{j=1}^n K_{ij}(t) \geq \sum_{j=1}^n \tilde{K}_{ij}(t) \quad \forall i \in \{1, \dots, n\} \quad \text{and} \quad t \in [0, T].$$

Then,

$$R_i(t) \geq \tilde{R}_i(t) \quad \forall t \in [0, T]$$

**Proof:** The result of Lemma A.3 can be written as

$$\frac{1}{\mu_i^1} \frac{dR_i}{dt} + R_i \geq \frac{1}{\mu_i^1} \frac{d\tilde{R}_i}{dt} + \tilde{R}_i \quad \forall t \in [0, T]$$

which implies

$$\frac{d}{dt} \left( R_i e^{\mu_i^1 t} \right) \geq \frac{d}{dt} \left( \tilde{R}_i e^{\mu_i^1 t} \right)$$

and hence, after integrating and cancelling exponentials, one finds

$$R_i(t) \geq \tilde{R}_i(t) \quad \forall t \in [0, T]$$

554 as required.

## 555 A.5 Lemma A.5

**Lemma A.5.** *Suppose that*

$$T := \inf \left\{ t : K_{ij}(t) < \tilde{K}_{ij}(t) \quad \text{or} \quad L_{ij}(t) < \tilde{L}_{ij}(t) \quad \text{for some } i, j \in \{1, \dots, n\} \right\}$$

*exists. Then, for some  $b \in \{1, \dots, n\}$ , and some real constants  $\kappa$  and  $\eta$ ,*

$$R_b(T) + \kappa R_b^V(T) = \tilde{R}_b(T) + \kappa \tilde{R}_b^V(T),$$

$$I_b(T) + \eta I_b^V(T) \leq \tilde{I}_b(T) + \eta \tilde{I}_b^V(T)$$

and

$$0 \leq \kappa \leq \eta \leq 1$$

**Proof:** Suppose that  $T$  exists. Then, by continuity, there exists some  $a$  and  $b$  such that  $K_{ab}(T) = \tilde{K}_{ab}(T)$  or  $L_{ab}(T) = \tilde{L}_{ab}(T)$ . These can be rearranged to give, respectively,

$$R_b(T) + \frac{\mu_b^1 \beta_{ab}^2}{\mu_b^2 \beta_{ab}^1} R_b^V(T) = \tilde{R}_b(T) + \frac{\mu_b^1 \beta_{ab}^2}{\mu_b^2 \beta_{ab}^1} \tilde{R}_b^V(T)$$

or

$$R_b(T) + \frac{\mu_b^1 \beta_{ab}^4}{\mu_b^2 \beta_{ab}^3} R_b^V(T) = \tilde{R}_b(T) + \frac{\mu_b^1 \beta_{ab}^4}{\mu_b^2 \beta_{ab}^3} \tilde{R}_b^V(T).$$

This can be written as

$$R_b(T) + \kappa R_b^V(T) = \tilde{R}_b(T) + \kappa \tilde{R}_b^V(T),$$



where, by the inequality constraints on the  $\beta_{ij}^\alpha$  and  $\mu_i^\alpha$

$$\kappa \leq \frac{\mu_b^1}{\mu_b^2}. \quad (26)$$

Moreover, note that

$$\frac{d}{dt} (R_b + \kappa R_b^V) = \mu_b^1 I_b + \frac{\beta_{ab}^2 \mu_b^1}{\beta_{ab}^1} I_b^V$$

is a continuous function. Thus, if

$$\frac{d}{dt} (R_b + \kappa R_b^V) \Big|_{t=T} > \frac{d}{dt} (\tilde{R}_b + \kappa \tilde{R}_b^V) \Big|_{t=T},$$

then there exists some  $\tau > 0$  such that

$$\int_T^{T+\tau} \frac{d}{dt} (R_b(s) + \kappa R_b^V(s)) ds > \int_T^{T+\tau} \frac{d}{dt} (\tilde{R}_b(s) + \kappa \tilde{R}_b^V(s)) ds \quad \forall t \in [0, \tau]$$

and hence, in particular

$$R_b(T+t) + \kappa R_b^V(T+t) > \tilde{R}_b(T+t) + \kappa \tilde{R}_b^V(T+t) \quad \forall t \in [0, \tau],$$

Thus, it is necessary that there is some  $b$  such that

$$\frac{d}{dt} (R_b + \kappa R_b^V) \Big|_{t=T} \leq \frac{d}{dt} (\tilde{R}_b + \kappa \tilde{R}_b^V) \Big|_{t=T}$$

so

$$I_b(T) + \frac{\kappa \mu_b^2}{\mu_b^1} I_b^V(T) \leq \tilde{I}_b(T) + \frac{\kappa \mu_b^2}{\mu_b^1} \tilde{I}_b^V(T).$$

This can be written as

$$I_b(t) + \eta I_b^V(t) \leq \tilde{I}_b(t) + \eta \tilde{I}_b^V(t),$$

where, by (26), the fact that  $\mu_b^2 \geq \mu_b^1$ , and the non-negativity of all parameters,

$$0 \leq \kappa \leq \eta \leq 1.$$

556 as required

## 557 **A.6 Lemma A.6**

For the purposes of this lemma, it is helpful to recall the inequality system (7)-(13).

$$S_b(T) + S_b^V(T) \leq \tilde{S}_b(T) + \tilde{S}_b^V(T), \quad (7)$$

$$I_b(T) + R_b(T) \geq \tilde{I}_b(T) + \tilde{R}_b(T) \quad (8)$$

$$R_b(T) \geq \tilde{R}_b(T), \quad (9)$$

$$R_b(T) + \kappa R_b^V(T) \leq \tilde{R}_b(T) + \kappa \tilde{R}_b^V(T), \quad (10)$$

$$I_b(T) + \eta I_b^V(T) \leq \tilde{I}_b(T) + \eta \tilde{I}_b^V(T), \quad (11)$$

$$0 \leq \kappa \leq \eta \leq 1. \quad (12)$$

and

$$\begin{aligned} S_b(T) + I_b(T) + R_b(T) + S_b^V(T) + I_b^V(T) + R_b^V(T) = \\ \tilde{S}_b(T) + \tilde{I}_b(T) + \tilde{R}_b(T) + \tilde{S}_b^V(T) + \tilde{I}_b^V(T) + \tilde{R}_b^V(T), \end{aligned} \quad (13)$$

**Lemma A.6.** *Suppose that the system (7) - (13) holds for some  $b \in \{1, \dots, n\}$  and some  $T \geq 0$ . Then,*

$$\begin{aligned} \eta I_b^V(T) + \kappa R_b^V(T) &= \eta \tilde{I}_b^V(T) + \kappa \tilde{R}_b^V(T) \\ I_b(T) + R_b(T) &= \tilde{I}_b(T) + \tilde{R}_b(T) \\ I_b^V(T) + R_b^V(T) &= \tilde{I}_b^V(T) + \tilde{R}_b^V(T) \\ S_b(T) + S_b^V(T) &= \tilde{S}_b(T) + \tilde{S}_b^V(T). \end{aligned}$$

**Proof:** To begin, note that adding inequalities (7), (10) and (11) gives

$$\begin{aligned} S_b(T) + S_b^V(T) + R_b(T) + \kappa R_b^V(T) + I_b(T) + \eta I_b^V(T) \leq \\ \tilde{S}_b(T) + \tilde{S}_b^V(T) + \tilde{R}_b(T) + \kappa \tilde{R}_b^V(T) + \tilde{I}_b(T) + \eta \tilde{I}_b^V(T) \end{aligned}$$

and then, using (13) shows that

$$(\kappa - 1)R_b^V(T) + (\eta - 1)I_b^V(T) \leq (\kappa - 1)\tilde{R}_b^V(T) + (\eta - 1)\tilde{I}_b^V(T). \quad (27)$$

Moreover, adding (10) and (11) shows that

$$I_b(T) + \eta I_b^V(T) + R_b(T) + \kappa R_b^V(T) \leq \tilde{I}_b(T) + \eta \tilde{I}_b^V(T) + \tilde{R}_b(T) + \kappa \tilde{R}_b^V(T)$$

and then, using (8) shows that

$$\eta I_b^V(T) + \kappa R_b^V(T) \leq \eta \tilde{I}_b^V(T) + \kappa \tilde{R}_b^V(T). \quad (28)$$

Now, from the inequality (10) combined with the inequality (9), it must be the case that

$$R_b^V(T) - \tilde{R}_b^V(T) \leq \frac{1}{\kappa} (\tilde{R}_b(T) - R_b(T)) \leq 0. \quad (29)$$

Define

$$x := R_b^V(T) - \tilde{R}_b^V(T) \quad \text{and} \quad y := I_b^V(T) - \tilde{I}_b^V(T)$$

so that the system given by (12), (27), (28) and (29) reduces to

$$(\kappa - 1)x + (\eta - 1)y \leq 0 \tag{30}$$

$$\kappa x + \eta y \leq 0 \tag{31}$$

$$x \leq 0$$

$$0 \leq \kappa \leq \eta \leq 1.$$

558 Note first that  $x = 0$  implies that  $y = 0$  as  $\eta$  and  $(\eta - 1)$  have different signs.  
 559 Thus, in this case, the inequalities (30) and (31) are in fact equalities.

Suppose instead that  $x \neq 0$  (so  $x < 0$ ). The first two of these inequalities can be rearranged (noting the signs of the denominators) to give

$$-\frac{(\kappa - 1)x}{(\eta - 1)} \leq y \leq \frac{-\kappa x}{\eta}$$

and so, as  $-x > 0$ ,

$$\frac{(\kappa - 1)}{(\eta - 1)} \leq -\frac{y}{x} \leq \frac{\kappa}{\eta}. \tag{32}$$

However, note that

$$\begin{aligned} \kappa < \eta &\Rightarrow \eta\kappa - \eta < \eta\kappa - \kappa \\ &\Rightarrow \eta(\kappa - 1) < \kappa(\eta - 1) \\ &\Rightarrow \frac{\kappa - 1}{\eta - 1} > \frac{\kappa}{\eta} \end{aligned}$$

and hence, as  $\kappa \leq \eta$ , for there to be solutions to the inequality (32), it is necessary that

$$\kappa = \eta \Rightarrow \frac{-y}{x} = 1 \Rightarrow y = -x.$$

This means that the inequalities (30) and (31) are satisfied to equality in this and hence, from before, all cases. Thus, it is necessary that

$$(\kappa - 1)R_b^V(T) + (\eta - 1)I_b^V(T) = (\kappa - 1)\tilde{R}_b^V(T) + (\eta - 1)\tilde{I}_b^V(T) \tag{33}$$

and

$$\eta I_b^V(T) + \kappa R_b^V(T) = \eta \tilde{I}_b^V(T) + \kappa \tilde{R}_b^V(T), \tag{34}$$

which is the first required equality. Thus, one can once again add the inequalities (10) and (11) to give

$$I_b(T) + R_b(T) + \left[ \eta I_b^V(T) + \kappa R_b^V(T) \right] \leq \tilde{I}_b(T) + \tilde{R}_b(T) + \left[ \eta \tilde{I}_b^V(T) + \kappa \tilde{R}_b^V(T) \right]$$

and so

$$I_b(T) + R_b(T) \leq \tilde{I}_b(T) + \tilde{R}_b(T), \tag{35}$$

which, combined with (8), shows that

$$I_b(T) + R_b(T) = \tilde{I}_b(T) + \tilde{R}_b(T). \quad (36)$$

Moreover, one can subtract (33) from (34) to get

$$I_b^V(T) + R_b^V(T) = \tilde{I}_b^V(T) + \tilde{R}_b^V(T)$$

and then, using (13) alongside (35) and (36) shows

$$S_b(T) + S_b^V(T) = \tilde{S}_b(T) + \tilde{S}_b^V(T)$$

560 as required.

## 561 **A.7 Lemma A.7**

562 Note that for this lemma, it will be assumed that each  $K_{ij}(t) \geq \tilde{K}_{ij}(t)$ , rather  
563 than the inequality simply holding for their sums as before.

**Lemma A.7.** *Under the assumptions of Proposition 1, suppose that the system of inequalities (7) - (13) holds for some  $b \in \{1, \dots, n\}$  and some  $T > 0$ . Suppose further that*

$$K_{ij}(t) \geq \tilde{K}_{ij}(t) \quad \forall i, j \in \{1, \dots, n\}.$$

Then,

$$W_i(t) = \tilde{W}_i(t) \quad \forall i \in \{1, \dots, n\} \quad \text{and} \quad \forall t \in [0, T].$$

**Proof:** By Lemma A.6, the system (14) - (16) must hold for  $b$ . Now, Equation (25) in the proof of Lemma A.3 shows that

$$I_b(T) + R_b(T) = \frac{S_b(0)}{N_b} \int_0^T \left[ \sum_{k=1}^n K'_{bk}(s) \right] (N_b - W_b(s)) e^{-\sum_{j=1}^n K_{bk}(s)} ds. \quad (37)$$

Now, the equality (14) shows

$$I_b(T) + R_b(T) = \tilde{I}_b(T) + \tilde{R}_b(T)$$

and hence, after cancelling the non-zero  $S_b(0)$  and  $N_b$  terms, (37) (and its tilde equivalent) shows that

$$\begin{aligned} & \int_0^T \left[ \sum_{k=1}^n K'_{bk}(s) \right] (N_b - W_b(s)) e^{-\sum_{k=1}^n K_{bk}(s)} ds \\ &= \int_0^T \left[ \sum_{k=1}^n \tilde{K}'_{bk}(s) \right] (N_b - \tilde{W}_b(s)) e^{-\sum_{k=1}^n \tilde{K}_{bk}(s)} ds. \end{aligned} \quad (38)$$

Note that, from Lemma B.6, as  $\Pi = \{1, \dots, n\}$

$$\tilde{I}_k(s), I_k(s) > 0 \quad \forall k \in \{1, \dots, n\} \quad \text{and} \quad s > 0.$$

Thus,

$$K'_{bk}(t) \geq \beta_{bk}^1 I_j(t) > 0 \quad \forall t > 0.$$

In particular,

$$\left[ \sum_{j=1}^n K'_{bk}(s) \right] e^{-\sum_{j=1}^n K_{bk}(s)} > 0 \quad \forall s \in [0, T].$$

Moreover, by continuity of  $K'_{ik}$  (as continuous functions attain their bounds on closed intervals), there exists some  $m > 0$  such that

$$\left[ \sum_{k=1}^n K'_{bk}(s) \right] e^{-\sum_{k=1}^n K_{bk}(s)} > m \quad \forall s \in [0, T].$$

Hence, as  $W_b \leq \tilde{W}_b$

$$\begin{aligned} & \int_0^T \left[ \sum_{k=1}^n K'_{bk}(s) \right] (N_b - W_b(s)) e^{-\sum_{k=1}^n K_{bk}(s)} ds \\ &= \int_0^T \left[ \sum_{k=1}^n K'_{bk}(s) \right] (N_b - \tilde{W}_b(s) + (\tilde{W}_b(s) - W_b(s))) e^{-\sum_{k=1}^n K_{bk}(s)} ds \\ &\geq \int_0^T \left[ \sum_{k=1}^n K'_{bk}(s) \right] (N_b - \tilde{W}_b(s)) e^{-\sum_{k=1}^n K_{bk}(s)} ds + m \int_0^T \tilde{W}_b(s) - W_b(s) ds. \end{aligned} \tag{39}$$

Finally, as  $N - \tilde{W}_b$  is decreasing and for any  $t \in [0, T]$ ,

$$\int_0^t \left[ \sum_{k=1}^n K'_{bk}(s) \right] e^{-\sum_{k=1}^n K_{bk}(s)} ds \geq \int_0^t \left[ \sum_{k=1}^n \tilde{K}'_{bk}(s) \right] e^{-\sum_{k=1}^n \tilde{K}_{bk}(s)} ds$$

one has, by Lemma A.1, setting

$$g(t) = 1 - e^{-\sum_{k=1}^n K_{bk}(t)}, \quad h(t) = e^{-\sum_{k=1}^n \tilde{K}_{bk}(s)}$$

and  $f(t) = N_b - \tilde{W}_b(s)$ ,

$$\int_0^T \left[ \sum_{k=1}^n K'_{bk}(s) \right] (N_b - \tilde{W}_b(s)) e^{-\sum_{k=1}^n K_{bk}(s)} ds$$

$$\begin{aligned} &\geq \int_0^T \left[ \sum_{k=1}^n \tilde{K}'_{bk}(s) \right] (N_b - \tilde{W}_b(s)) e^{-\sum_{k=1}^n \tilde{K}_{bk}(s)} ds \\ &= \tilde{I}_b(T) + \tilde{R}_b(T) \end{aligned}$$

and so, combining this with (39),

$$I_b(T) + R_b(T) \geq \tilde{I}_b(T) + \tilde{R}_b(T) + m \int_0^T \tilde{W}_b(s) - W_b(s) ds \geq \tilde{I}_b(T) + \tilde{R}_b(T) = I_b(T) + R_b(T).$$

Hence,

$$\int_0^T \tilde{W}_b(s) - W_b(s) ds = 0,$$

which by continuity means

$$W_b(t) = \tilde{W}_b(t) \quad \forall t \in [0, T]$$

Now, moreover, substituting this back into the equality given in (38) shows that

$$\begin{aligned} &\int_0^T \left[ \sum_{k=1}^n K'_{bk}(s) \right] (N_b - W_b(s)) e^{-\sum_{k=1}^n K_{bk}(s)} ds \\ &= \int_0^T \left[ \sum_{k=1}^n \tilde{K}'_{bk}(s) \right] (N_b - W_b(s)) e^{-\sum_{k=1}^n \tilde{K}_{bk}(s)} ds. \end{aligned}$$

Hence, integrating by parts, this shows that

$$\begin{aligned} 0 &= (N_b - W_b(T)) (e^{-\sum_{k=1}^n K_{bk}(T)} - e^{-\sum_{k=1}^n \tilde{K}_{bk}(T)}) \dots \\ &+ \int_0^T U_b(s) (e^{-\sum_{k=1}^n K_{bk}(s)} - e^{-\sum_{k=1}^n \tilde{K}_{bk}(s)}) ds \end{aligned}$$

Now,

$$\sum_{k=1}^n \tilde{K}_{bk}(s) \geq \sum_{k=1}^n K_{bk}(s) \quad \forall s \in [0, T]$$

and so, for equality, it is necessary that

$$(N_b - W_b(T)) (e^{-\sum_{k=1}^n K_{bk}(T)} - e^{-\sum_{k=1}^n \tilde{K}_{bk}(T)}) = 0$$

Thus, as it is assumed that  $W_b(t) < N_b$  for all  $t \geq 0$ ,

$$e^{-\sum_{k=1}^n K_{bk}(T)} - e^{-\sum_{k=1}^n \tilde{K}_{bk}(T)} = 0$$

and hence, as  $K_{bk}(T) \geq \tilde{K}_{bk}(T)$  for all  $k \in \{1, \dots, n\}$ ,

$$K_{bk}(T) = \tilde{K}_{bk}(T) \quad \forall k \in \{1, \dots, n\} \quad (40)$$

Now, suppose that  $K'_{bk}(T) > \tilde{K}'_{bk}$  for some  $k$ . Then, by continuity and the fact that  $T > 0$ , it is necessary that there is some  $\tau \in (0, T)$  such that

$$\int_{T-\tau}^T K'_{bk}(s) ds > \int_{T-\tau}^T \tilde{K}'_{bk}(s) ds$$

which means that

$$K_{bk}(T - \tau) < \tilde{K}_{bk}(T - \tau)$$

which is a contradiction to the definition of  $T$ . Thus, it is necessary that

$$K'_{bk}(T) \leq \tilde{K}'_{bk}(T) \quad \forall k \in \{1, \dots, n\}. \quad (41)$$

Dividing (40) by  $\beta_{bk}^1/\mu_k^1$  and (41) by  $\beta_{bk}^1$  shows that the inequality system (7) - (13) holds for each  $k$  (as Lemmas A.2 - A.4 hold for any group) and so, following Lemma A.6 and the previous work of this proof, it is necessary that

$$W_k(t) = \tilde{W}_k(t) \quad \forall t \in [0, T]$$

564 This holds for each  $k$  and hence the proof is complete.

## 565 A.8 Lemma A.8

**Lemma A.8.** Define functions  $\Delta_i^f$  to be

$$\Delta_i^f(t) := f_i(T+t) - \tilde{f}_i(T+t) \quad \text{for } f \in \{S, I, R, S^V, I^V, R^V, W\}$$

and suppose that

$$\Delta_i^f(0) = 0 \quad \forall f \in \{S, I, R, S^V, I^V, R^V, W\}. \quad (42)$$

Suppose further that the  $U_i(t)$  are right-continuous step functions. Then, for  $t \in [0, \delta]$  in the limit  $\delta \rightarrow 0$ , and for any  $x, y \in \mathfrak{R}$

$$\frac{x}{\mu_i^1} \Delta_i^R + \frac{y}{\mu_i^2} \Delta_i^{R^V} = \frac{t^3 S_i(T)(U_i(T) - \tilde{U}_i(T))}{6(N_i - W_i(T))} \left[ x \sum_{j=1}^n (K'_{ij}(T)) - y \sum_{j=1}^n (L'_{ij}(T)) \right] + O(\delta^4).$$

**Proof:** As the  $U_i(t)$  are step functions, for sufficiently small  $\delta$ , they are constant on the interval  $[T, T + \delta]$ , so this will be assumed. Note that, for any  $i \in \{1, \dots, n\}$  and any  $t \geq 0$

$$\left| \frac{dS_i}{dt}(t) \right| \leq \left| \sum_{j=1}^n S_i(t) \beta_{ij}^1 I_j(t) \right| + \left| \frac{S_i(t)}{N_i - W_i(t)} U_i(t) \right|$$

$$\begin{aligned} &\leq \left| \sum_{j=1}^n N_i \beta_{ij}^1 N_j \right| + |1 \times U_i(t)| \\ &\leq U_i(T) + C, \end{aligned}$$

where the constant term,  $C$ , is independent of  $t$  and the vaccination policy. Note the second line follows from the fact that, as  $W_i(t) < N_i$ ,

$$\frac{S_i(t)}{N_i - W_i(t)} = \frac{S_i(0)}{N_i} \exp \left[ - \sum_{j=1}^n K_{ij}(t) \right] \leq 1.$$

Similarly, one can show (by increasing the constant  $C$  if necessary) that

$$\begin{aligned} \left| \frac{dS_i^V}{dt}(t) \right| &\leq U_i(T) + C \\ \left| \frac{dI_i^V}{dt}(t) \right|, \left| \frac{dR_i^V}{dt}(t) \right|, \left| \frac{dI_i}{dt}(t) \right|, \left| \frac{dR_i}{dt}(t) \right| &\leq C \\ \left| \frac{dW_i}{dt}(t) \right| &\leq U_i(T). \end{aligned}$$

Then, for  $t \in (0, \delta)$  and  $f \in \{S, I, R, S^V, I^V, R^V, W\}$

$$|f_i(T+t) - f_i(T)| = \left| \int_T^{T+t} \frac{df_i}{dt}(s) ds \right| \leq (C + U_i(T))\delta$$

so that, in particular

$$f_i(T+t) = f_i(T) + O(\delta) \quad \forall f \in \{S, I, R, S^V, I^V, R^V, W\}. \quad (43)$$

Now,

$$\frac{d\Delta_i^S}{dt} = - \sum_{j=1}^n (K_{ij} S_i - \tilde{K}_{ij} \tilde{S}_j) + \frac{S_i U_i}{N_i - W_i} - \frac{\tilde{S}_i \tilde{U}_i}{N_i - \tilde{W}_i}.$$

Using (42) and (43), this equation linearises to

$$\frac{d\Delta_i^S}{dt}(t) = \frac{S_i(T)(U_i(t+T) - \tilde{U}_i(t+T))}{N_i - W_i(T)} + O(\delta).$$

Noting that

$$U_i(t+T) - \tilde{U}_i(t+T) = U_i(T) - \tilde{U}_i(T) \quad \forall t \in [0, \delta]$$

this means that

$$\frac{d\Delta_i^S}{dt} = \frac{S_i(T)(U_i(T) - \tilde{U}_i(T))}{N_i - W_i(T)} + O(\delta)$$



and so (for  $t < \delta$ )

$$\Delta_i^S(t) = t \frac{S_i(T)(U_i(T) - \tilde{U}_i(T))}{N_i - W_i(T)} + O(\delta^2).$$

Now, one can linearise the equation for  $\Delta_i^I$ . Note that

$$\frac{d\Delta_i^I}{dt} = \sum_{j=1}^n (K'_{ij} S_i - \tilde{K}'_{ij} \tilde{S}_i) + \mu_i^1 (I_i - \tilde{I}_i)$$

and so, with

$$I_i(t + T) = I_i(T) + O(\delta)$$

and similar expressions for other variables,

$$\frac{d\Delta_i^I}{dt} = O(\delta) \Rightarrow \Delta_i^I(t) = O(\delta^2) \quad \text{for } t < \delta$$

Now, one can linearise in a different way. Note that

$$\tilde{I}_i(T + t) = I_i(T + t) + O(\delta^2) \quad \text{and} \quad \tilde{I}_i^V(T + t) = I_i^V(T + t) + O(\delta^2)$$

so

$$\tilde{K}'_{ij}(T + t) = K'_{ij}(T + t) + O(\delta^2).$$

Thus,

$$\begin{aligned} \frac{d\Delta_i^I}{dt}(T + t) &= \sum_{j=1}^n (K'_{ij}(T + t) S_i(T + t) - \tilde{K}'_{ij}(T + t) \tilde{S}_i(T + t)) + \mu_i^1 \Delta_i^I(T + t) + O(\delta^2) \\ &= \Delta_i^S(t) \sum_{j=1}^n (K'_{ij}(T + t)) + O(\delta^2) \\ &= t \frac{S_i(T)(U_i(T) - \tilde{U}_i(T))}{N_i - W_i(T)} \sum_{j=1}^n (K'_{ij}(T) + O(\delta)) + O(\delta^2) \\ &= t \frac{S_i(T)(U_i(T) - \tilde{U}_i(T))}{N_i - W_i(T)} \sum_{j=1}^n (K'_{ij}(T)) + O(\delta^2) \end{aligned}$$

and hence

$$\Delta_i^I = \frac{t^2}{2} \frac{S_i(T)(U_i(T) - \tilde{U}_i(T))}{N_i - W_i(T)} \sum_{j=1}^n (K'_{ij}(T)) + O(\delta^3).$$

Thus,

$$\frac{d\Delta_i^R}{dt} = \Delta_i^I \mu_i^1 \Rightarrow \Delta_i^R(t) = \frac{\mu_i^1 t^3}{6} \frac{S_i(T)(U_i(T) - \tilde{U}_i(T))}{N_i - W_i(T)} \sum_{j=1}^n (K'_{ij}(T)) + O(\delta^4).$$

Now, note that

$$\frac{d(\Delta_i^S + \Delta_i^{S^V})}{dt} = O(\delta)$$

as this derivative has no explicit dependence on  $U$ . Thus, in particular,

$$\Delta_i^S + \Delta_i^{S^V} = O(\delta^2)$$

and so

$$\Delta_i^{S^V} = -t \frac{S_i(T)(U_i(T) - \tilde{U}_i(T))}{N_i - W_i(T)} + O(\delta^2).$$

Then, as before (as the equation for  $\frac{dI_i}{dt}$  is the same as that for  $\frac{dI_i^V}{dt}$ , but with  $S_i^V$  instead of  $S_i$ ,  $\mu_i^1$  instead of  $\mu_i^2$  and  $K_{ij}$  instead of  $L_{ij}$ )

$$\frac{d\Delta_i^{I^V}}{dt}(T+t) = -t \frac{S_i(T)(U_i(T) - \tilde{U}_i(T))}{N_i - W_i(T)} \sum_{j=1}^n (L'_{ij}(T)) + O(\delta^2),$$

which means

$$\Delta_i^{I^V} = -\frac{t^2}{2} \frac{S_i(T)(U_i(T) - \tilde{U}_i(T))}{N_i - W_i(T)} \sum_{j=1}^n (L'_{ij}(T)) + O(\delta^3)$$

and hence

$$\Delta_i^{R^V}(t) = -\frac{\mu_i^2 t^3}{6} \frac{S_i(T)(U_i(T) - \tilde{U}_i(T))}{N_i - W_i(T)} \sum_{j=1}^n (L'_{ij}(T)) + O(\delta^4).$$

Thus,

$$\frac{x}{\mu_i^1} \Delta_i^R + \frac{y}{\mu_i^2} \Delta_i^{R^V} = \frac{t^3 S_i(T)(U_i(T) - \tilde{U}_i(T))}{6(N_i - W_i(T))} \left[ x \sum_{j=1}^n (K'_{ij}(T)) - y \sum_{j=1}^n (L'_{ij}(T)) \right] + O(\delta^4)$$

566 as required.

## 567 **A.9 Lemma A.9**

**Lemma A.9.** *Suppose that*

$$T := \inf \left\{ t : K_{ij}(t) \geq \tilde{K}_{ij} \quad \text{or} \quad L_{ij}(t) \geq \tilde{L}_{ij}(t) \quad \text{for some } i, j \in \{1, \dots, n\} \right\}$$

exists. Define functions  $\Delta_i^f$  to be

$$\Delta_i^f(t) := f_i(T+t) - \tilde{f}_i(T+t) \quad \text{for } f \in \{S, I, R, S^V, I^V, R^V, W\}$$

and suppose that

$$\Delta_i^f(0) = 0 \quad \forall f \in \{S, I, R, S^V, I^V, R^V, W\}.$$

Suppose further that the  $U_i(t)$  are right-continuous step functions,  $\Pi = \{1, \dots, n\}$  and that

$$\beta_{ij}^1 > \beta_{ij}^3 > 0 \quad \text{and} \quad I_i(0) > 0 \quad \forall i, j \in \{1, \dots, n\}.$$

Then,

$$\sum_{j=1}^n K_{ij}(t) \geq \sum_{j=1}^n \tilde{K}_{ij}(t) \quad \forall t \in [0, T + \delta]$$

and

$$\sum_{j=1}^n L_{ij}(t) \geq \sum_{j=1}^n \tilde{L}_{ij}(t) \quad \forall t \in [0, T + \delta],$$

568 for sufficiently small  $\delta$ .

**Proof:** By Lemma A.8, with  $x = \beta_{li}^1$  and  $y = \beta_{li}^2$  for some  $l \in \{1, \dots, n\}$

$$\frac{\beta_{li}^1}{\mu_i^1} \Delta_i^R + \frac{\beta_{li}^2}{\mu_i^2} \Delta_i^{R^V} = \frac{t^3 S_i(T)(U_i(T) - \tilde{U}_i(T))}{6(N_i - W_i(T))} \left[ \beta_{li}^1 \sum_{j=1}^n (K'_{ij}(T)) - \beta_{li}^2 \sum_{j=1}^n (L'_{ij}(T)) \right] + O(\delta^4).$$

Now, as  $\beta_{li}^1 \geq \beta_{li}^2$ ,  $\beta_{li}^1 > 0$  and  $K'_{ij}(t)$  and  $L'_{ij}(t)$  are non-negative

$$\beta_{li}^1 \sum_{j=1}^n (K'_{ij}(T)) - \beta_{li}^2 \sum_{j=1}^n (L'_{ij}(T)) \leq 0 \Rightarrow \sum_{j=1}^n (K'_{ij}(T)) \leq \sum_{j=1}^n (L'_{ij}(T)). \quad (44)$$

Noting that

$$K'_{ij}(T) \geq L'_{ij}(T) \quad \forall j \in \{1, \dots, n\},$$

(44) requires

$$K'_{ij}(T) = L'_{ij}(T) \quad \forall j \in \{1, \dots, n\}$$

which, from the definitions of  $K'$  and  $L'$  requires

$$\beta_{ij}^1 I_j(T) + \beta_{ij}^2 I_j^V(T) = \beta_{ij}^3 I_j(T) + \beta_{ij}^4 I_j^V(T).$$

Thus, as  $I_j(T) > 0$  (as  $\Pi \in \{1, \dots, n\}$ ) and  $\beta_{ij}^2 I_j^V(T) \geq \beta_{ij}^4 I_j^V(T)$ , it is necessary that

$$\beta_{ij}^1 \leq \beta_{ij}^3,$$

which is a contradiction. Thus,

$$\beta_{ij}^1 \sum_{j=1}^n (K'_{ij}(T)) - \beta_{ij}^2 \sum_{j=1}^n (L'_{ij}(T)) > 0$$

which means

$$S_i(T)U_i(T) < S_i(T)\tilde{U}_i(T) \Rightarrow \frac{\beta_{ij}^1}{\mu_i^1} \Delta_i^R + \frac{\beta_{ij}^2}{\mu_i^2} \Delta_i^{R^V} = -C\delta^3 + O(\delta^4)$$

for some positive constant  $C$ . Now, if

$$S_i(T)U_i(T) > S_i(T)\tilde{U}_i(T)$$

then, necessarily,  $U_i(T) > \tilde{U}_i(T)$ . Thus, as  $\Delta_i^W(0) = 0$ , one will have

$$W_i(T+t) > \tilde{W}_i(T+t)$$

for sufficiently small  $t$ , which is a contradiction. Moreover, if

$$S_i(T)U_i(T) = S_i(T)\tilde{U}_i(T) \quad \forall i \in \{1, \dots, n\}$$

569 then the vaccination policies are the same in the interval  $[T, T + \delta]$ , as for each  
 570  $i$ , either  $S_i(T) = 0$  (in which case there is no more vaccination in group  $i$  so  
 571  $U_i(T) = \tilde{U}_i(T) = 0$ ) or  $U_i(T) = \tilde{U}_i(T)$ . Thus, the disease trajectories are the  
 572 same, which contradicts the definition of  $T$ , as then  $K_{ij}(T+t) = \tilde{K}_{ij}(T+t)$   
 573 and  $L_{ij}(T+t) = \tilde{L}_{ij}(T+t)$  for all  $t \in [0, \delta]$ .

Now, note that

$$\sum_{i=1}^n K_{li}(t) - \sum_{i=1}^n \tilde{K}_{li}(t) = \sum_{i=1}^n \left( \frac{\beta_{li}^1}{\mu_i^1} \Delta_i^R + \frac{\beta_{li}^2}{\mu_i^2} \Delta_i^{R^V} \right) = - \sum_{i=1}^n E_i \delta^3 + O(\delta^4),$$

where  $E_i > 0$  if  $U_i(T) < \tilde{U}_i(T)$  and  $E_i = 0$  otherwise. Thus, in particular

$$\sum_{i=1}^n E_i > 0$$

and hence

$$\sum_{i=1}^n K_{li}(t) - \sum_{i=1}^n \tilde{K}_{li}(t) = - \sum_{i=1}^n E_i \delta^3 + O(\delta^4) < 0$$

for sufficiently small  $\delta$ . Thus,

$$\sum_{j=1}^n K_{ij}(t) \geq \sum_{j=1}^n \tilde{K}_{ij}(t) \quad \forall t \in [0, T + \delta]$$

and, by identical arguments (using  $x = \beta_{i_i}^3$  and  $y = \beta_{i_i}^4$  in Lemma A.8)

$$\sum_{j=1}^n L_{ij}(t) \geq \sum_{j=1}^n \tilde{L}_{ij}(t) \quad \forall t \in [0, T + \delta]$$

574 as required.

## 575 A.10 Lemma A.10

**Lemma A.10.** *Suppose that*

$$T := \inf \left\{ t : K_{ij}(t) < \tilde{K}_{ij}(t) \quad \text{or} \quad L_{ij}(t) < \tilde{L}_{ij}(t) \quad \text{for some } i, j \in \{1, \dots, n\} \right\}.$$

*Then, for any  $\delta > 0$ , there exists some  $t \in (T, T + \delta)$  and some real parameters  $0 \leq \kappa \leq \eta \leq 1$  such that*

$$R_b(t) + \kappa R_b^V(t) < \tilde{R}_b(t) + \kappa \tilde{R}_b^V(t) \quad \text{and} \quad I_b(t) + \eta I_b^V(t) \leq \tilde{I}_b(t) + \eta \tilde{I}_b^V(t).$$

**Proof:** Firstly, note that by the definition of  $T$ , for each  $\delta > 0$ , there must exist  $i, j \in \{1, \dots, n\}$  and  $t \in (0, \delta)$  such that

$$K_{ij}(T + t) < \tilde{K}_{ij}(T + t) \quad \text{or} \quad L_{ij}(T + t) < \tilde{L}_{ij}(T + t).$$

That is, there is some  $b \in \{1, \dots, n\}$  such that

$$R_b(T + t) + \kappa R_b^V(T + t) < \tilde{R}_b(T + t) + \kappa \tilde{R}_b^V(T + t) \quad (45)$$

where

$$\kappa \leq \frac{\mu_b^1}{\mu_b^2}.$$

Note that

$$\mu_b^1 I_b(t) + \kappa \mu_b^2 I_b^V(t) = \frac{d}{dt} (R_b(t) + \kappa R_b^V(t)).$$

Now, define

$$\Delta_i^f(t) := f_i(T + t) - \tilde{f}_i(T + t) \quad \forall f \in \{I, I^V, R, R^V\}$$

and

$$\tau := \sup\{s \in [0, t] : \Delta_b^R(s) + \kappa \Delta_b^{R^V}(s) \geq 0\}$$

which exists as  $\Delta_b^R(0) + \kappa \Delta_b^{R^V}(0) = 0$ . Note that  $\tau < t$  by (45). Note also that by continuity, it is necessary that

$$\Delta_b^R(\tau) + \kappa \Delta_b^{R^V}(\tau) = 0.$$

Now, by the mean value theorem (as  $\Delta_b^R + \kappa\Delta_b^{R^V}$  is continuously differentiable), there exists an  $s$  in the non empty interval  $(\tau, t)$  such that

$$\begin{aligned} \mu_1^b \Delta_b^I(s) + \kappa\mu_b^2 \Delta_b^{I^V}(s) &= \frac{1}{t - \tau} \left[ (\Delta_b^R(t) + \kappa\Delta_b^{R^V}(t)) - (\Delta_b^R(\tau) + \kappa\Delta_b^{R^V}(\tau)) \right] \\ &= \frac{1}{t - \tau} \left[ \Delta_b^R(t) + \kappa\Delta_b^{R^V}(t) \right] \\ &< 0 \end{aligned}$$

while also

$$\Delta_b^R(s) + \kappa\Delta_b^{R^V}(s) < 0,$$

by definition of  $\tau$ . Thus, defining  $\eta := \kappa \frac{\mu_b^2}{\mu_1^b} \leq 1$ ,

$$\Delta_b^R(s) + \kappa\Delta_b^{R^V}(s) < 0 \quad \Delta_b^I(s) + \eta\Delta_b^{I^V}(s) \geq 0 \quad \text{and} \quad 0 \leq \kappa \leq \eta \leq 1$$

576 as required.

## 577 **A.11 Lemma A.11**

**Lemma A.11.** *Consider two non-negative functions  $A(t)$  and  $B(t)$  such that  $B(t)$  is non-decreasing and differentiable with a Lebesgue integrable derivative  $B'(t)$  satisfying*

$$\int_0^t B'(s)ds = B(t) - B(0) \quad \forall t \geq 0.$$

*Suppose further that for each  $T \geq 0$ , one can partition the interval  $[0, T]$  into a finite number of subintervals  $S_1^A, \dots, S_m^A$  and  $S_1^B, \dots, S_k^B$  such that*

$$s \in \bigcup_{i=1}^m S_i^A \Leftrightarrow A(s) > B'(s)$$

*Then, there exists a unique function  $\chi(t)$  for  $t \geq 0$  such that*

$$\chi(t) := \begin{cases} A(t) & \text{if } \int_0^t \chi(s)ds < B(t) \\ \min(A(t), B'(t)) & \text{if } \int_0^t \chi(s)ds \geq B(t) \end{cases}$$

**Proof:**  $\chi$  can be constructed for each of the subintervals  $S_i^A$  and  $S_i^B$ . Note first that,

$$t \in S_i^B \Rightarrow B'(t) \geq A(t) \Rightarrow \chi(t) = A(t)$$

Now, suppose that  $t \in S_i^A$  for some  $i$ . Then, as  $S_i^A$  is an interval, one can suppose  $S_i^A = [c_i, d_i]$ . Define

$$\tau := \inf \left( \left\{ s \in S_i^A : B(s) \leq \int_0^{c_i} \chi(u)du + \int_{c_i}^s A(u)du \right\} \cup \{d_i\} \right).$$

If  $\tau = d_i$ , then one has (uniquely)  $\chi(t) = A(t)$  in  $S_i^A$ . Otherwise, one has (again uniquely)

$$\chi(t) = A(t) \quad \forall t \in [c_i, \tau] \quad \text{and} \quad \chi(t) = B'(t) \quad \forall t \in [\tau, d_i]$$

Uniqueness can be demonstrated as follows. If  $\chi(t) = B'(t)$  for some  $t \in [c_i, \tau]$ , then it is necessary (as  $A(t) > B'(t)$  so  $\chi(t) \neq A(t)$  in this case)

$$\int_0^t \chi(s) \geq B(t)$$

As  $A(t) \geq B'(t)$  in  $S_i^A$ , so  $\chi(t)$  is bounded by  $A(t)$ , the previous inequality can be extended to give

$$B(t) \leq \int_0^t \chi(s) \leq \int_0^{c_i} \chi(u) du + \int_{c_i}^s A(u) du$$

578 which contradicts the definition of  $\tau$ . A similar argument stands to prove  
579 uniqueness in  $[\tau, d_i]$ .

580

581 Thus,  $\chi$  is uniquely defined in each of the finite number of intervals and hence  
582 in  $[0, T]$  for each  $T$  and hence, it is uniquely defined for all  $t$  as required.

## 583 B Results on the SIR Equations

584 This section presents a variety of results on the SIR equations which are used  
585 in the proofs of the theorems in this paper. Many of them are well-known and  
586 widely used in the literature, but this appendix aims to provide a source of  
587 formal definitions and proofs of these results.

588 Before the results can be proved, it is necessary to establish two lemmas  
589 on differential equations.

### 590 B.1 Lemma B.1

**Lemma B.1.** *Suppose that  $H(t)$  is a continuous non-negative  $n \times n$  matrix for  $t \geq 0$  and that  $\mathbf{a} \in \mathbb{R}^n$ . Then, suppose that a function  $\mathbf{u} : \mathbb{R} \rightarrow \mathbb{R}^n$  satisfies*

$$\mathbf{u}(t) \leq \mathbf{a} + \int_0^t H(s)\mathbf{u}(s) ds \quad \forall t \geq 0.$$

Then,

$$\mathbf{u}(t) \leq \left(1 + \int_0^t V(t, s)H(s) ds\right) \mathbf{a},$$

where the matrix  $V(t, s)$  satisfies

$$V(t, s) = I_n + \int_s^t H(k)V(k, s)dk$$

591 and  $I_n$  is the  $n \times n$  identity matrix.

592 **Proof:** This theorem is a special case of the theorem proved in [Chandra](#)  
593 [and Davis \(1976\)](#) where (in the notation of [Chandra and Davis \(1976\)](#)),  $x$ ,  $y$   
594 and  $z$  have been replaced by  $t$ ,  $s$  and  $k$  respectively,  $G(t)$  has been set to be  
595 the identity matrix and  $x^0$  has been set to zero.

## 596 B.2 Lemma B.2

**Lemma B.2.** Consider a continuous, time-dependent, matrix  $A(t)$  which satisfies

$$A(t)_{ij} \geq 0 \quad \forall t \geq 0 \quad \text{and} \quad \forall i \neq j$$

and a constant matrix  $B$  that satisfies

$$B_{ij} \geq 0 \quad \forall t \geq 0 \quad \text{and} \quad \forall i \neq j.$$

Then, suppose that each element of  $A(t)$  is non-increasing with  $t$  and that

$$A(t)_{ij} \geq B_{ij} \quad \forall t \geq 0 \quad \text{and} \quad \forall i \neq j.$$

Moreover, define a non-negative initial condition  $\mathbf{v}$  and suppose that  $\mathbf{y}$  and  $\mathbf{z}$  solve the systems

$$\frac{d\mathbf{y}}{dt} = A(t)\mathbf{y} \quad \text{and} \quad \frac{d\mathbf{z}}{dt} = B\mathbf{z}$$

with

$$\mathbf{y}(0) = \mathbf{z}(0) = \mathbf{v} \geq \mathbf{0}.$$

Then,

$$\mathbf{y}(t) \geq \mathbf{z}(t) \geq \mathbf{0} \quad \forall t \geq 0.$$

**Proof:** To begin, define

$$\mu := \min_i (B_{ii})$$

so that, defining

$$A^*(t) := A(t) + \mu I \quad \text{and} \quad B^* := B + \mu I,$$

where  $I$  is the identity matrix,  $A^*$  and  $B^*$  are non-negative matrices. Moreover, note that

$$\frac{d\mathbf{y}}{dt} + \mu\mathbf{y} = A^*(t)\mathbf{y}$$



and so

$$e^{-\mu t} \frac{d}{dt} (e^{\mu t} \mathbf{y}) = A^*(t) \mathbf{y}.$$

Thus, define

$$\mathbf{y}^*(t) := e^{\mu t} \mathbf{y}(t)$$

so

$$\frac{d\mathbf{y}^*}{dt} = A^*(t) \mathbf{y}^*.$$

Similarly, defining

$$\mathbf{z}^*(t) := e^{\mu t} \mathbf{z}(t)$$

gives

$$\frac{d\mathbf{z}^*}{dt} = B\mathbf{z}^*$$

while, moreover,

$$\mathbf{y}^* \geq \mathbf{z}^* \Leftrightarrow \mathbf{y} \geq \mathbf{z} \quad \text{and} \quad \mathbf{z}^* \geq \mathbf{0} \Leftrightarrow \mathbf{z} \geq \mathbf{0}.$$

Thus, it is simply necessary to prove that the results of this lemma hold when  $A(t)$  and  $B$  are non-negative matrices.

Now, it is helpful to note that, as the off-diagonal entries of  $A(t)$  and  $B$  are non-negative, the two differential systems are totally positive [Schwarz \(1970\)](#). Thus, in particular, as  $\mathbf{v}$  is non-negative,

$$\mathbf{y}(t), \mathbf{z}(t) \geq \mathbf{0} \quad \forall t \geq 0,$$

which proves one of the required inequalities. Now, one can also note that

$$\frac{d}{dt} (\mathbf{y} - \mathbf{z}) = A(t) \mathbf{y} - B\mathbf{z}.$$

As  $A(t)$  is assumed to be non-negative, and  $\mathbf{y}$  is non-negative,

$$\frac{d}{dt} (\mathbf{y} - \mathbf{z}) \geq B(\mathbf{y} - \mathbf{z}).$$

Defining  $\zeta := \mathbf{z} - \mathbf{y}$  and integrating gives

$$\zeta(t) \leq \int_0^t B(s) \zeta(s) ds,$$

noting that  $\zeta = \mathbf{0}$ . Hence, by Lemma [B.1](#), one has

$$\zeta(t) \leq \mathbf{0} \Rightarrow \mathbf{y} \geq \mathbf{z}$$

598 **B.3 Lemma B.3**

**Lemma B.3.** *Define the set of functions*

$$\mathcal{F}_i(t) := \left\{ S_i(t), I_i(t), R_i(t), S_i^V(t), I_i^V(t), R_i^V(t) \right\}.$$

Then, for all  $t \geq 0$  and  $i \in \{1, \dots, n\}$ ,

$$0 \leq f \leq N_i \quad \forall f \in \mathcal{F}_i(t).$$

**Proof:** Noting that

$$\sum_{f \in \mathcal{F}_i(t)} f = N_i,$$

it is simply necessary to show that (for each  $t$  and  $i$ )

$$f(t) \geq 0 \quad \forall f(t) \in \mathcal{F}_i(t).$$

Now, note that

$$\frac{dS_i}{dt} = - \sum_{j=1}^n (\beta_{ij}^1 I_j + \beta_{ij}^2 I_j^V) S_i - \frac{U_i(t) S_i}{N_i - W_i(t)},$$

which means

$$\frac{d}{dt} \left( S_i \exp \left[ - \sum_{j=1}^n \left( \frac{\beta_{ij}^1}{\mu_j^1} R_j + \frac{\beta_{ij}^2}{\mu_j^2} R_j^V \right) - \ln(N_i - W_i) \right] \right) = 0$$

and hence (using the initial conditions)

$$S_i(t) = \frac{S_i(0)(N_i - W_i(t))}{N_i} \exp \left( - \sum_{j=1}^n \left[ \frac{\beta_{ij}^1}{\mu_j^1} R_j + \frac{\beta_{ij}^2}{\mu_j^2} R_j^V \right] \right).$$

As  $W_i(t) \leq N_i$  by construction, this means that

$$S_i(t) \geq 0 \quad \text{as required.}$$

Now, note that

$$\frac{dS_i^V}{dt} = - \sum_{j=1}^n (\beta_{ij}^3 I_j + \beta_{ij}^4 I_j^V) S_i^V + \frac{U_i(t) S_i}{N_i - W_i(t)} \geq - \sum_{j=1}^n (\beta_{ij}^3 I_j + \beta_{ij}^4 I_j^V) S_i^V$$

so that

$$\frac{d}{dt} \left( S_i^V \exp \left[ \sum_{j=1}^n \left( \frac{\beta_{ij}^3}{\mu_j^1} R_j + \frac{\beta_{ij}^4}{\mu_j^2} R_j^V \right) \right] \right) \geq 0,$$

which means (as  $S_i^V(0) = 0$ )

$$S_i^V(t) \exp \left[ \sum_{j=1}^n \left( \frac{\beta_{ij}^3}{\mu_j^1} R_j(t) + \frac{\beta_{ij}^4}{\mu_j^2} R_j^V(t) \right) \right] \geq 0$$

and hence

$$S_i^V(t) \geq 0 \quad \text{as required.}$$

Now, define the vector

$$\mathbf{y} := \begin{pmatrix} \mathbf{I} \\ \mathbf{I}^V \end{pmatrix}$$

Then, one can rewrite the equations for  $I_i$  and  $I_i^V$  in the form

$$\frac{d\mathbf{y}}{dt} = M(\mathbf{S}(t), \mathbf{S}^V(t))\mathbf{y}$$

for some matrix  $M$ , where, from the previous results

$$M_{ij} \geq 0 \quad \forall i \neq j.$$

Thus, from Lemma B.2,

$$\mathbf{y}(t) \geq \mathbf{0} \quad \forall t \geq 0.$$

Then,

$$\frac{dR_i}{dt} = \mu_i^1 I_i \geq 0 \quad \text{so} \quad R_i(t) \geq 0$$

and similarly,

$$R_i^V(t) \geq 0$$

and so the proof is complete.

## B.4 Lemma B.4

**Lemma B.4.** *For each  $i$ ,*

$$\lim_{t \rightarrow \infty} (I_i(t)) = \lim_{t \rightarrow \infty} (I_i^V(t)) = 0.$$

**Proof:** Firstly, suppose

$$\lim_{t \rightarrow \infty} (\inf \{I_i(s) : s \geq t\}) = Q,$$

noting this infimum exists as  $I_i$  is bounded below by 0, and the limit exists as the sequence of infima given  $s \leq t$  is non-decreasing and bounded above by  $N_i$ . If  $Q \neq 0$ , there exists some  $m > 0$  and some  $t$  such that for all  $s \geq t$

$$I_i(s) \geq m \Rightarrow \frac{dR_i}{dt}(s) \geq m\mu_i^1 \Rightarrow R_i \left( t + \frac{2N_i}{m\mu_i^1} \right) > N_i$$

which contradicts Lemma B.3. Thus,  $Q = 0$  and so there exists some sequence  $t_n$  such that

$$\lim_{n \rightarrow \infty} (t_n) = \infty \quad \text{and} \quad \lim_{n \rightarrow \infty} (I(t_n)) = 0. \quad (46)$$

Now note that  $S_i(t)$  is non-increasing and bounded and that  $R_i(t)$  and  $(S_i^V(t) + I_i^V(t) + R_i^V(t))$  are non-decreasing and bounded. Thus, their limits as  $t \rightarrow \infty$  must exist and be finite, so in particular

$$\lim_{t \rightarrow \infty} (I_i(t)) = \lim_{t \rightarrow \infty} (N_i - S_i(t) - R_i(t) - S_i^V(t) - I_i^V(t) - R_i^V(t))$$

must exist. Thus, by (46), the only possible limit is 0 so

$$\lim_{t \rightarrow \infty} (I_i(t)) = Q = 0$$

as required. By noting that  $S_i(t) + S_i^V(t)$  is non-increasing and that  $I_i(t) + R_i(t)$  and  $R_i^V(t)$  are non-decreasing, an identical argument shows that

$$\lim_{t \rightarrow \infty} (I_i^V(t)) = 0.$$

## 601 **B.5 Lemma B.5**

**Lemma B.5.** *Suppose that  $I_i(t) > 0$  for some  $t \geq 0$  and some  $i \in \{1, \dots, n\}$ . Then,*

$$I_i(s) > 0 \quad \forall s > t.$$

602 *An analogous result holds for  $I_i^V(t)$ .*

**Proof:** Note that

$$\frac{dI_i}{dt} \geq -\mu_i^1 I_i$$

and so

$$\frac{d}{dt} \left( e^{\mu_i^1 t} I_i(t) \right) \geq 0$$

which means, for any  $s > t$

$$e^{\mu_i^1 s} I_i(s) \geq e^{\mu_i^1 t} I_i(t)$$

and hence

$$I_i(s) > 0$$

603 as required. The same argument then works for  $I_i^V(t)$  as well (with a  $\mu_i^2$  instead  
604 of a  $\mu_i^1$ ).

## 605 **B.6 Lemma B.6**

**Lemma B.6.** *Define*

$$\Pi := \{i : \exists t \geq 0 \quad s.t. \quad I_i(t) > 0 \quad \text{or} \quad I_i^V(t) > 0\}.$$

Moreover, define

$$\Pi^0 := \{i : I_i(0) > 0\}$$

and the  $n$  by  $n$  matrix  $M$  by

$$M_{ij} = S_i(0)\beta_{ij}^1.$$

Then, define the connected component  $C$  of  $\Pi^0$  in  $M$  as follows. The index  $i \in \{1, \dots, n\}$  belongs to  $C$  if and only if there is some sequence  $a_1, \dots, a_k$  such that

$$\begin{aligned} a_j &\in \{1, \dots, n\} \quad \forall j \in \{1, \dots, k\}, \\ M_{a_1, a_2} M_{a_2, a_3} \dots M_{a_{k-1}, a_k} &> 0 \end{aligned}$$

and

$$a_1 = i \quad \text{and} \quad a_k \in \Pi^0.$$

Then,

(a)  $i \in C \Rightarrow I_i(t) > 0 \quad \forall t > 0.$

(b)  $\Pi = C \cup \Pi^0.$

Thus, in particular,

$$i \in C \cup \Pi^0 = \Pi \Leftrightarrow I(t) > 0 \quad \forall t > 0.$$

**Proof: (a):** The proof will proceed by induction. For  $k \geq 1$ , define  $P^k$  is the set of elements of  $C$  that are connected to an element of  $\Pi^0$  by a sequence of length at most  $k$ . Then, note that

$$P^k \subseteq P^{k+1} \quad \forall k \geq 1$$

and

$$P^{n^2} = C$$

606 as there are  $n^2$  elements in  $M$ . (Thus, if  $i \in C$  then there must be a sequence  
607 of length at most  $n^2$  connecting  $i$  with an element in  $\Pi^0$  as any loops can be  
608 ignored.)

The inductive hypothesis is that

$$i \in P^k \Rightarrow I_i(t) > 0 \quad \forall t > 0.$$

The explanation of the base case will be left until the end of the proof. Suppose that this claim holds for some  $k \geq 0$ . If  $P^{k+1} = P^k$ , then

$$i \in P^{k+1} \Rightarrow i \in P^k \Rightarrow I_i(t) > 0 \quad \forall t > 0$$

and so the inductive step is complete. Otherwise, consider any  $i \in P^{k+1}/P^k$ . Then, there exists some  $j$  such that

$$M_{ij} > 0 \quad \text{and} \quad j \in P^k.$$

Thus, by continuity, for sufficiently small  $\tau$ ,

$$t < \tau \Rightarrow S_i(t)\beta_{ij}^1 > 0$$

and indeed, by Boundedness Theorem, there exists some  $\chi > 0$  such that

$$S_i(t)\beta_{ij}^1 > \chi \quad \forall t \in [0, \tau].$$

Now, choose any  $\epsilon \in [0, \tau]$ . By Boundedness Theorem,  $I_i(t)$  achieves is bounded and achieves its maximum,  $\theta_\epsilon$  in the interval  $[0, \epsilon]$ . Moreover,  $\theta_\epsilon > 0$  as  $I_i(t) > 0$  in  $(0, \epsilon)$  by assumption. Thus, by continuity, there exists some non-empty region  $(\delta_\epsilon, \Delta_\epsilon)$  such that

$$t \in (\delta_\epsilon, \Delta_\epsilon) \Rightarrow I_i(t) > \frac{\theta_\epsilon}{2}.$$

Thus, in particular

$$\int_0^\epsilon S_i(t)\beta_{ij}^1 I_j(t) dt \geq \chi \int_{\delta_\epsilon}^{\Delta_\epsilon} I_j(t) dt \geq \frac{\chi\theta_\epsilon}{2} (\Delta_\epsilon - \delta_\epsilon) > 0.$$

Now, note that

$$\frac{dI_i}{dt} \geq S_i(t)\beta_{ij}^1 I_j(t) - \mu_i^1 I_i(t).$$

Suppose for a contradiction that  $I_i(t) = 0$  for all  $t \in [0, \epsilon]$ . Then,

$$\frac{dI_i}{dt} \geq S_i(t)\beta_{ij}^1 I_j(t) \Rightarrow I_i(\epsilon) \geq I_i(0) + \frac{\chi M_\epsilon}{2} (\Delta_\epsilon - \delta_\epsilon)$$

and hence,

$$I_i(\epsilon) > 0,$$

which is a contradiction. Thus, there exists a  $t \in [0, \epsilon]$  such that  $I_i(t) > 0$  and hence, by Lemma B.5,

$$I_i(t) > 0 \quad \forall t \in [\epsilon, \infty).$$

Thus, as  $\epsilon$  was any constant in the region  $(0, \tau)$ , and  $\tau > 0$ , this means that

$$I_i(t) > 0 \quad \forall t > 0$$

609 as required.

610

611 Finally, note that the base case  $k = 1$  can be proved in exactly the same  
612 way, except now  $j \in \Pi^0$  (but this still means that  $I_j(t) > 0$  for all  $t > 0$  by  
613 Lemma B.5), and so (a) has been proved.

614

(b): The previous work has shown that

$$C \subseteq \Pi.$$

Hence, as clearly  $\Pi^0 \subseteq \Pi$ , this means that

$$C \cup \Pi^0 \subseteq \Pi$$

and so it suffices to prove that

$$\Pi \subseteq C \cup \Pi^0.$$

That is, it suffices to prove

$$i \notin C \cup \Pi^0 \Rightarrow I_i(t) = I_i^V(t) = 0 \quad \forall t \geq 0.$$

To check that this solution satisfies the equations, one notes that, in this case, if  $i \notin C \cup \Pi^0$ , then

$$\begin{aligned} \frac{dI_i}{dt} &= \sum_{j=1}^n S_i(t) \beta_{ij}^1 I_j(t) + \sum_{j=1}^n S_i(t) \beta_{ij}^2 I_j^V(t) - \mu I_i(t) \\ &= \sum_{j \in C \cup \Pi^0} S_i(t) \beta_{ij}^1 I_j(t) + \sum_{j \in C \cup \Pi^0} S_i(t) \beta_{ij}^2 I_j^V(t) \end{aligned}$$

and, similarly,

$$\frac{dI_i^V}{dt} = \sum_{j \in C \cup \Pi^0} S_i^V(t) \beta_{ij}^3 I_j(t) + \sum_{j \in C \cup \Pi^0} S_i(t) \beta_{ij}^4 I_j^V(t),$$

615 as  $I_j(t) = I_j^V(t) = 0$  for all  $j \notin C \cup \Pi^0$ .

Now, suppose that  $i \notin C \cup \Pi^0$  and  $j \in C \cup \Pi^0$ . Then, by definition of  $C$ , this means that

$$M_{ij} = S_i(0) \beta_{ij}^1 = 0 \quad \forall j \in C \cup \Pi^0$$

and hence, as  $S_i$  is non-increasing and non-negative

$$S_i(t) \beta_{ij}^1 = 0 \quad \forall j \in C \cup \Pi^0.$$

Now, as  $\beta_{ij}^1 \geq \beta_{ij}^2 \geq 0$ , this means that

$$S_i(t) \beta_{ij}^2 = 0 \quad \forall j \in C \cup \Pi^0$$

so that

$$\sum_{j \in C \cup \Pi^0} S_i(t) \beta_{ij}^1 I_j(t) + \sum_{j \in C \cup \Pi^0} S_i(t) \beta_{ij}^2 I_j^V(t) = 0,$$

which means

$$\frac{dI_i}{dt} = 0 \quad \text{as required.}$$

Moreover, as  $S_i^V(0) = 0$ , it is necessary that

$$(S_i(0) + S_i^V(0))\beta_{ij}^1 = 0 \quad \forall j \in C \cup \Pi^0$$

so, as  $(S_i + S_i^V)\beta_{ij}^1$  is non-increasing and non-negative

$$(S_i(t) + S_i^V(t))\beta_{ij}^1 = 0 \quad \forall j \in C \cup \Pi^0$$

and hence, as  $S_i(t)$  is non-negative

$$(S_i^V(t))\beta_{ij}^1 = 0 \quad \forall j \in C \cup \Pi^0.$$

Thus, as  $\beta_{ij}^1 \geq \beta_{ij}^3 \geq \beta_{ij}^4 \geq 0$ , one has

$$\sum_{j \in C \cup \Pi^0} S_i^V(t)\beta_{ij}^3 I_j(t) + \sum_{j \in C \cup \Pi^0} S_i(t)\beta_{ij}^4 I_j^V(t) = 0$$

and hence

$$\frac{dI_i^V}{dt} = 0 \quad \text{as required.}$$

Then, one can separately solve the system for all  $j \in C \cup \Pi^0$  as the equations will now be independent of any indices  $i \notin C \cup \Pi^0$  (as they only depend on these indices via the  $I_i$  and  $I_i^V$  terms, which are identically zero). Thus, by the uniqueness of solution, one must have

$$i \in C \cup \Pi^0 \Rightarrow I_i(t) = I_i^V(t) = 0 \quad \forall t \geq 0$$

616 and hence part **(b)** is proved. Thus, the lemma has been proved.

## 617 **B.7 Lemma B.7**

**Lemma B.7.** *Consider a set  $C = [a_1, b_1] \times [a_2, b_2] \times \dots \times [a_n, b_n]$  that is a Cartesian product of real intervals. Suppose that  $f : \mathbb{R}^n \rightarrow \mathbb{R}$  is differentiable with bounded derivatives in  $C$ . Then,  $f$  is Lipschitz continuous on  $C$  - that is, there exists some  $L > 0$  such that*

$$|f(\mathbf{x}) - f(\mathbf{y})| \leq L \sum_{i=1}^n |x_i - y_i| \quad \forall \mathbf{x}, \mathbf{y} \in C.$$

**Proof:** Note that, by assumption, for each  $i$ ,

$$\frac{\partial f}{\partial x_i} \quad \text{is bounded in } C,$$



so define the global bound for all  $i$  to be  $M$ . Choose some  $\mathbf{x}, \mathbf{y} \in C$ . Define the points  $\mathbf{p}^k \in C$  for  $k = 0, 1, \dots, n$  by

$$p_i^k = \begin{cases} y_i & \text{if } i \leq k \\ x_i & \text{otherwise} \end{cases}$$

and define the curve  $\gamma_i$  to be the straight line joining the point  $\mathbf{p}^{i-1}$  to the point  $\mathbf{p}^i$ . As  $C$  is a product of intervals, the  $\gamma_i$  lie entirely in  $C$ .

Define  $\Gamma$  to be the union of the curves  $\gamma_i$ , so that  $\Gamma$  joins  $\mathbf{p}^0 = \mathbf{x}$  to  $\mathbf{p}^n = \mathbf{y}$ . Then

$$\begin{aligned} |f(\mathbf{x}) - f(\mathbf{y})| &= \left| \int_{\Gamma} \nabla f \cdot d\mathbf{x} \right| \\ &= \left| \sum_{i=1}^n \int_{\gamma_i} \nabla f \cdot d\mathbf{x} \right| \\ &= \left| \sum_{i=1}^n \int_{s=x_i}^{s=y_i} \frac{\partial f}{\partial x_i}(\mathbf{p}^{i-1} + (s - x_i)\mathbf{e}_i) ds \right| \\ &\leq \sum_{i=1}^n \left| \int_{s=x_i}^{s=y_i} \frac{\partial f}{\partial x_i}(\mathbf{p}^{i-1} + (s - x_i)\mathbf{e}_i) ds \right| \\ &\leq \sum_{i=1}^n \sup_{\mathbf{s} \in C} \left| \frac{\partial f}{\partial x_i}(\mathbf{s}) \right| |y_i - x_i| \\ &\leq M \sum_{i=1}^n |y_i - x_i| \end{aligned}$$

where  $\mathbf{e}_i$  is the  $i$ th canonical basis vector. Hence, the required Lipschitz continuity holds with  $M = L$ .

## B.8 Lemma B.8

**Lemma B.8.** *Define the set of functions*

$$\mathcal{F} := \left\{ S_i(t; \epsilon), I_i(t; \epsilon), R_i(t; \epsilon), S_i^V(t; \epsilon), I_i^V(t; \epsilon), R_i^V(t; \epsilon) : i \in \{1, \dots, n\}, \quad \epsilon, t \geq 0 \right\},$$

where for each fixed  $\epsilon$ , these functions solve the model equations with parameters

$$\mathcal{P} = \left\{ \beta_{i_j}^\alpha(\epsilon), \mu_i^\gamma(\epsilon) : i, j \in \{1, \dots, n\}, \quad \alpha \in \{1, 2, 3, 4\}, \quad \gamma \in \{1, 2\} \quad \text{and} \quad \epsilon \geq 0 \right\},$$

initial conditions

$$\mathcal{I} = \left\{ f(0; \epsilon) : i \in \{1, \dots, n\}, \quad f \in \mathcal{F} \quad \text{and} \quad \epsilon \geq 0 \right\}$$

and vaccination policy  $\mathbf{U}(t; \epsilon)$ . Suppose that

$$|p(\epsilon) - p(0)| \leq \epsilon \quad \forall p \in \mathcal{P},$$

$$|f_i(0; \epsilon) - f_i(0; 0)| \leq \epsilon \quad \forall f \in \mathcal{F}$$

and that

$$|W_i(t, \epsilon) - W_i(t, 0)| < \epsilon \quad \forall t \geq 0.$$

Moreover, suppose that for each  $i \in \{1, \dots, n\}$  and  $\epsilon \geq 0$ ,

$$U_i(s; \epsilon) \geq 0 \quad \text{and} \quad \int_0^t U_i(s; \epsilon) ds \leq N_i \quad \forall t \geq 0.$$

Then, for each  $\delta > 0$  and each  $T > 0$  there exists some  $\eta > 0$  (that may depend on  $T$  and  $\delta$ ) such that

$$\epsilon \in (0, \eta) \Rightarrow |f(t; \epsilon) - f(t; 0)| < \delta \quad \forall f \in \mathcal{F} \quad \text{and} \quad \forall t \in [0, T]$$

**Proof:** To begin, it is helpful to note that, by Lemma B.3,

$$f(t; \epsilon) \in [0, \max(N_i)] \quad \forall f \in \mathcal{F} \quad \text{and} \quad t \geq 0$$

and that, by assumption on the feasibility of  $U_i$

$$W(t; \epsilon) \in [0, \max(N_i)] \quad \forall t \geq 0.$$

Moreover, as the parameter values converge, it can be assumed that

$$p(\epsilon) \in [\alpha, \beta] \quad \forall \epsilon \geq 0 \quad \text{and} \quad p \in \mathcal{P}$$

623 for some  $\alpha, \beta \geq 0$ . Moreover, it can be assumed that, as each  $\mu_i^a > 0$ , there is  
624 some  $\gamma > 0$  such that  $\mu_i^a(\epsilon) > \gamma$  for all  $\epsilon \geq 0$ .

However, there is no condition on the maximal difference (at a point) between  $U_i(t; \epsilon)$  and  $U_i(t; 0)$ . To avoid this problem, it is helpful to consider the variable  $S_i^O := S_i + S_i^V$  instead of  $S_i^V$ . Then, the equations for  $S_i$  and  $S_i^O$  can be written as

$$S_i(t; \epsilon) = \frac{S_i(0)(N_i - W_i(t; \epsilon))}{N_i} \exp \left[ - \sum_{j=1}^n \left( \frac{\beta_{ij}^1(\epsilon) R_j(t; \epsilon)}{\mu_j^1(\epsilon)} + \frac{\beta_{ij}^2(\epsilon) R_j^V(t; \epsilon)}{\mu_j^2(\epsilon)} \right) \right]$$

$$\frac{dS_i^O(t; \epsilon)}{dt} = - \sum_{j=1}^n \left[ (\beta_{ij}^1(\epsilon) I_j(t; \epsilon) + \beta_{ij}^2(\epsilon) I_j^V(t; \epsilon)) S_i(t; \epsilon) \right]$$

$$- \sum_{j=1}^n \left[ (\beta_{ij}^3(\epsilon) I_j(t; \epsilon) + \beta_{ij}^4(\epsilon) I_j^V(t; \epsilon)) (S_i^O(t; \epsilon) - S_i(t; \epsilon)) \right].$$

Then, one can define

$$\mathbf{v} := (\mathbf{S}^O, \mathbf{I}, \mathbf{I}^V, \mathbf{R}, \mathbf{R}^V)^T$$

and  $\mathbf{p}(\epsilon)$  to be a vector of the elements of  $\mathcal{P}$  at some  $\epsilon \geq 0$ . Then, (substituting for  $\mathbf{S}$ ), the model equations can be written in the form

$$\frac{d\mathbf{v}(t; \epsilon)}{dt} = \Phi(\mathbf{v}(t; \epsilon), \mathbf{W}(t; \epsilon), \mathbf{p}(\epsilon))$$

where  $\Phi$  is a smooth function. Thus, from Lemma B.7, there exists some constant  $L$  such that, for  $\mathbf{v}$ ,  $\mathbf{W}$  and  $\mathbf{p}$  within the closed bounded feasible set of values and any  $j \in \{1, \dots, 5n\}$ ,

$$|\Phi(\mathbf{v}, \mathbf{W}, \mathbf{p})_j - \Phi(\mathbf{v}^*, \mathbf{W}^*, \mathbf{p}^*)_j| \leq L \left( \sum_{i=1}^{5n} |v_i - v_i^*| + \sum_{i=1}^n |W_i - W_i^*| + \sum_{i=1}^{4n^2+2n} |p_i - p_i^*| \right).$$

Thus, in particular, this means that

$$\begin{aligned} \frac{d}{dt} \left( |v_j(t; \epsilon) - v_j(t; 0)| \right) &\leq \left| \frac{d}{dt} \left( v_j(t; \epsilon) - v_j(t; 0) \right) \right| \\ &\leq \left| \Phi(\mathbf{v}(t; \epsilon), \mathbf{W}(t; \epsilon), \mathbf{p}(\epsilon))_i - \Phi(\mathbf{v}(t; 0), \mathbf{W}(t; 0), \mathbf{p}(\epsilon))_i \right| \\ &\leq L \left( \sum_{i=1}^{5n} |v_i(t; \epsilon) - v_i(t; 0)| + \sum_{i=1}^n |W_i(t; \epsilon) - W_i(t; 0)| \dots \right. \\ &\quad \left. + \sum_{i=1}^{4n^2+2n} |p_i - p_i^*| \right). \end{aligned}$$

Now, adding these  $5n$  inequalities together, one seems that

$$\begin{aligned} \frac{d}{dt} \left( \sum_{i=1}^{5n} |v_i(t; \epsilon) - v_i(t; 0)| \right) \\ \leq 5nL \left( \sum_{i=1}^{5n} |v_i(t; \epsilon) - v_i(t; 0)| + \sum_{i=1}^n |W_i(t; \epsilon) - W_i(t; 0)| + \sum_{i=1}^{4n^2+2n} |p_i - p_i^*| \right) \end{aligned}$$

and hence

$$\sum_{i=1}^{5n} \left[ \frac{d}{dt} \left( e^{-5nLt} |v_i(t; \epsilon) - v_i(t; 0)| \right) \right]$$

$$\begin{aligned} &\leq 5nLe^{-5nLt} \left( \sum_{i=1}^n |W_i(t; \epsilon) - W_i(t; 0)| + \sum_{i=1}^{4n^2+2n} |p_i - p_i^*| \right) \\ &\leq (15n^2 + 20n^3)L\epsilon e^{-5nLt}. \end{aligned}$$

Thus, integrating (and using the fact that the initial conditions differ by at most  $\epsilon$ )

$$\begin{aligned} e^{-5nLt} \sum_{i=1}^{5n} |v_i(t; \epsilon) - v_i(t; 0)| &\leq \sum_{i=1}^{5n} |v_i(0; \epsilon) - v_i(0; 0)| + (3n + 4n^2)\epsilon(1 - e^{-5nLt}) \\ &\leq 5n\epsilon + (3n + 4n^2)\epsilon(1 - e^{-5nLt}) \end{aligned}$$

which means

$$\sum_{i=1}^{5n} |v_i(t; \epsilon) - v_i(t; 0)| \leq 5n\epsilon e^{5nLt} + (3n + 4n^2)\epsilon(e^{5nLt} - 1)$$

and hence, for each  $i \in \{1, \dots, 5n\}$

$$|v_i(t; \epsilon) - v_i(t; 0)| \leq 5n\epsilon e^{5nLt} + (3n + 4n^2)\epsilon(e^{5nLt} - 1).$$

The right-hand side is non-decreasing in  $t$  (as  $L > 0$ ) so, taking

$$\epsilon < \frac{\delta}{5ne^{5nLt} + (3n + 4n^2)(e^{5nLt} - 1)}$$

ensures that the required inequalities hold for  $\mathbf{I}$ ,  $\mathbf{I}^V$ ,  $\mathbf{R}$  and  $\mathbf{R}^V$  for all  $s \leq t$ . Now, note also that  $S_i(t; \epsilon)$  is a smooth function of  $W_i(t; \epsilon)$ ,  $\mathbf{v}(\epsilon)$ ,  $S_i(0; \epsilon)$  and  $\mathbf{p}$  so that there exists an  $L'$  such that

$$\begin{aligned} |S_i(t; \epsilon) - S_i(0; \epsilon)| &< L' \left( \sum_{i=1}^{5n} |v_i - v_i^*| + \sum_{i=1}^n |W_i - W_i^*| \dots \right. \\ &\quad \left. + \sum_{i=1}^{4n^2+2n} |p_i - p_i^*| + |S_i(0; \epsilon) - S_i(0; 0)| \right) \\ &< L'\epsilon \left[ 5ne^{5nLt} + (3n + 4n^2)(e^{5nLt} - 1) + (3n + 4n^2) + 1 \right] \\ &:= \chi(t)\epsilon \end{aligned}$$

and so, as  $\chi(t)$  is non-decreasing in  $t$ , taking

$$\epsilon < \frac{\delta}{\chi(t)}$$

gives the required inequalities for  $\mathbf{S}$  for all times  $s \leq t$ . Finally, note that

$$\begin{aligned} |S_i^V(t; \epsilon) - S_i^V(t; 0)| &= |S_i^O(t; \epsilon) - S_i^O(t; 0) - S_i(t; \epsilon) + S_i(t; 0)| \\ &\leq |S_i^O(t; \epsilon) - S_i^O(t; 0)| + |S_i(t; \epsilon) - S_i(t; 0)| \\ &\leq +5n\epsilon e^{5nLt} + (3n + 4n^2)\epsilon(e^{5nLt} - 1) + \epsilon\chi(t) \end{aligned}$$

and so, as the right-hand side is increasing in  $t$ , taking

$$\epsilon < \frac{\delta}{5ne^{5nLt} + (3n + 4n^2)(e^{5nLt} - 1) + \chi(t)}$$

625 gives the required inequalities for  $\mathbf{S}^V$  for all times  $s \leq t$  and hence completes  
626 the proof.
